# Supplementary material for: Identifying patterns of health care utilisation among physical elder abuse victims using Medicare data and legally adjudicated cases: protocol for case–control study using data linkage and machine learning
Source: PubMed Central journal article supplement — BMJ Open. 2021 Feb 5;11(2):e044768. doi: 10.1136/bmjopen-2020-044768 (PMC7925867; doi:10.1136/bmjopen-2020-044768), 2021-02-05
Supplement: bmjopen-2020-044768.draft_revisions.pdf [file bmjopen-2020-044768.draft_revisions.pdf]

# BMJ Open

BMJ Open is committed to open peer review. As part of this commitment we make the peer review history of every article we publish publicly available.

When an article is published we post the peer reviewers' comments and the authors' responses online. We also post the versions of the paper that were used during peer review. These are the versions that the peer review comments apply to.

The versions of the paper that follow are the versions that were submitted during the peer review process. They are not the versions of record or the final published versions. They should not be cited or distributed as the published version of this manuscript.

BMJ Open is an open access journal and the full, final, typeset and author-corrected version of record of the manuscript is available on our site with no access controls, subscription charges or pay-per-view fees (<http://bmjopen.bmj.com>).

If you have any questions on BMJ Open's open peer review process please email [info.bmjopen@bmj.com](mailto:info.bmjopen@bmj.com)

# BMJ Open

## Identifying Patterns of Health Care Utilization among Physical Elder Abuse Victims Using Medicare Data and Legally Adjudicated Cases: Protocol for Case-Control Study using Data Linkage and Machine Learning

|                               |                                                                                                                                                                                                                                                                                                                                                                                                                                                                                                                                                                                                                                                                                                                                                                                                                                                                                                                                                                                                                                                                                                                                                                                                                                                                                                                                                                                                                                                    |
|-------------------------------|----------------------------------------------------------------------------------------------------------------------------------------------------------------------------------------------------------------------------------------------------------------------------------------------------------------------------------------------------------------------------------------------------------------------------------------------------------------------------------------------------------------------------------------------------------------------------------------------------------------------------------------------------------------------------------------------------------------------------------------------------------------------------------------------------------------------------------------------------------------------------------------------------------------------------------------------------------------------------------------------------------------------------------------------------------------------------------------------------------------------------------------------------------------------------------------------------------------------------------------------------------------------------------------------------------------------------------------------------------------------------------------------------------------------------------------------------|
| Journal:                      | <i>BMJ Open</i>                                                                                                                                                                                                                                                                                                                                                                                                                                                                                                                                                                                                                                                                                                                                                                                                                                                                                                                                                                                                                                                                                                                                                                                                                                                                                                                                                                                                                                    |
| Manuscript ID                 | bmjopen-2020-044768                                                                                                                                                                                                                                                                                                                                                                                                                                                                                                                                                                                                                                                                                                                                                                                                                                                                                                                                                                                                                                                                                                                                                                                                                                                                                                                                                                                                                                |
| Article Type:                 | Protocol                                                                                                                                                                                                                                                                                                                                                                                                                                                                                                                                                                                                                                                                                                                                                                                                                                                                                                                                                                                                                                                                                                                                                                                                                                                                                                                                                                                                                                           |
| Date Submitted by the Author: | 11-Sep-2020                                                                                                                                                                                                                                                                                                                                                                                                                                                                                                                                                                                                                                                                                                                                                                                                                                                                                                                                                                                                                                                                                                                                                                                                                                                                                                                                                                                                                                        |
| Complete List of Authors:     | Rosen, Tony; Weill Cornell Medicine / NewYork-Presbyterian Hospital, Department of Emergency Medicine<br>Bao, Yuhua; Weill Cornell Medical College, Department of Health Policy & Research<br>Zhang, Yiye; Weill Cornell Medical College, Department of Health Policy & Research<br>Clark, Sunday; Weill Cornell Medicine / NewYork-Presbyterian Hospital, Department of Emergency Medicine<br>Wen, Katherine; Cornell University, Department of Policy Analysis and Management<br>Elman, Alyssa; Weill Cornell Medicine / NewYork-Presbyterian Hospital, Department of Emergency Medicine<br>Jeng, Philip; Weill Cornell Medical College, Department of Health Policy & Research<br>Bloemen, Elizabeth; University of Colorado School of Medicine, Department of Internal Medicine<br>Lindberg, Daniel; University of Colorado School of Medicine, The Kempe Center for the Prevention & Treatment of Child Abuse & Neglect<br>Krugman, Richard; University of Colorado School of Medicine, The Kempe Center for the Prevention & Treatment of Child Abuse & Neglect<br>Campbell, Jacquelyn ; John Hopkins University<br>Bachman, Ronet; University of Delaware, Department of Criminology<br>Fulmer, Terry; John A Hartford Foundation<br>Pillemer, Karl ; Cornell University, Department of Policy Analysis and Management<br>Lachs, Mark ; Weill Cornell Medicine / NewYork-Presbyterian Hospital, Division of Geriatrics and Palliative Care, |
| Keywords:                     | GERIATRIC MEDICINE, HEALTH ECONOMICS, Protocols & guidelines < HEALTH SERVICES ADMINISTRATION & MANAGEMENT                                                                                                                                                                                                                                                                                                                                                                                                                                                                                                                                                                                                                                                                                                                                                                                                                                                                                                                                                                                                                                                                                                                                                                                                                                                                                                                                         |
|                               |                                                                                                                                                                                                                                                                                                                                                                                                                                                                                                                                                                                                                                                                                                                                                                                                                                                                                                                                                                                                                                                                                                                                                                                                                                                                                                                                                                                                                                                    |

SCHOLARONE™  
Manuscripts

1  
2  
3  
4  
5  
6  
7  
8  
9  
10  
11  
12  
13  
14  
15  
16  
17  
18  
19  
20  
21  
22  
23  
24  
25  
26  
27  
28  
29  
30  
31  
32  
33  
34  
35  
36  
37  
38  
39  
40  
41  
42  
43  
44  
45  
46  
47  
48  
49  
50  
51  
52  
53  
54  
55  
56  
57  
58  
59  
60

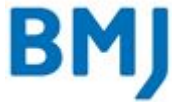

I, the Submitting Author has the right to grant and does grant on behalf of all authors of the Work (as defined in the below author licence), an exclusive licence and/or a non-exclusive licence for contributions from authors who are: i) UK Crown employees; ii) where BMJ has agreed a CC-BY licence shall apply, and/or iii) in accordance with the terms applicable for US Federal Government officers or employees acting as part of their official duties; on a worldwide, perpetual, irrevocable, royalty-free basis to BMJ Publishing Group Ltd ("BMJ") its licensees and where the relevant Journal is co-owned by BMJ to the co-owners of the Journal, to publish the Work in this journal and any other BMJ products and to exploit all rights, as set out in our [licence](#).

The Submitting Author accepts and understands that any supply made under these terms is made by BMJ to the Submitting Author unless you are acting as an employee on behalf of your employer or a postgraduate student of an affiliated institution which is paying any applicable article publishing charge ("APC") for Open Access articles. Where the Submitting Author wishes to make the Work available on an Open Access basis (and intends to pay the relevant APC), the terms of reuse of such Open Access shall be governed by a Creative Commons licence – details of these licences and which [Creative Commons](#) licence will apply to this Work are set out in our licence referred to above.

Other than as permitted in any relevant BMJ Author's Self Archiving Policies, I confirm this Work has not been accepted for publication elsewhere, is not being considered for publication elsewhere and does not duplicate material already published. I confirm all authors consent to publication of this Work and authorise the granting of this licence.

1  
2  
3  
4  
5  
6  
7  
8  
9  
10  
11  
12  
13  
14  
15  
16  
17  
18  
19  
20  
21  
22  
23  
24 **Identifying Patterns of Health Care Utilization among Physical Elder Abuse Victims Using**  
25 **Medicare Data and Legally Adjudicated Cases: Protocol for Case-Control Study using**  
26 **Data Linkage and Machine Learning**  
27  
28  
29  
30  
31

32 Tony Rosen MD MPH<sup>1</sup>, Yuhua Bao PhD<sup>2</sup>, Yiye Zhang PhD<sup>2</sup>, Sunday Clark ScD MPH<sup>1</sup>,  
33 Katherine Wen, MPP<sup>3</sup>, Alyssa Elman, LMSW<sup>1</sup>, Philip J. Jeng, MS<sup>2</sup>, Elizabeth Bloemen, MD,  
34 MPH<sup>4</sup>, Daniel Lindberg MD<sup>5</sup>, Richard Krugman MD<sup>5</sup>, Jacquelyn Campbell PhD<sup>6</sup>, Ronet  
35 Bachman PhD<sup>7</sup>, Terry Fulmer PhD<sup>8</sup>, Karl Pillemer PhD<sup>3</sup>, Mark S. Lachs MD<sup>9</sup>  
36  
37  
38

39 <sup>1</sup>Department of Emergency Medicine, Weill Cornell Medicine / NewYork-Presbyterian Hospital

40 <sup>2</sup>Department of Health Policy & Research, Weill Cornell Medical College

41 <sup>3</sup>Department of Policy Analysis and Management, Cornell University

42 <sup>4</sup>Department of Internal Medicine, University of Colorado School of Medicine

43 <sup>5</sup>The Kempe Center for the Prevention & Treatment of Child Abuse & Neglect, University of  
44 Colorado School of Medicine

45 <sup>6</sup>Johns Hopkins University School of Nursing

46 <sup>7</sup>Department of Criminology, University of Delaware

47 <sup>8</sup>John A. Hartford Foundation

48 <sup>9</sup>Division of Geriatrics and Palliative Care, Weill Cornell Medical College / NewYork-  
49 Presbyterian Hospital  
50  
51  
52  
53

54 Corresponding Author: Tony Rosen, MD MPH, 525 East 68<sup>th</sup> Street, Room 130, 212-746-1059,  
55 aer2006@med.cornell.edu  
56  
57  
58  
59  
60

## Abstract

**Introduction:** Physical elder abuse is common and has serious health consequences but is under-recognized and under-reported. As assessment by health care providers may represent the only contact outside family for many older adults, clinicians have a unique opportunity to identify suspected abuse and initiate intervention. Preliminary research suggests elder abuse victims may have different patterns of health care utilization than other older adults, with increased rates of Emergency Department use, hospitalization, and nursing home placement. Little is known, however, about the patterns of this increased utilization and associated costs. To help fill this gap, we describe here the protocol for a study exploring patterns of health care utilization and associated costs for known physical elder abuse victims compared to non-victims.

**Methods and Analysis:** We hypothesize that various aspects of health care utilization are differentially affected by physical elder abuse victimization, increasing ED/hospital utilization and reducing outpatient/primary care utilization. We will obtain Medicare claims data for a series of well-characterized, legally adjudicated cases of physical elder abuse to examine victims' health care utilization before and after the date of abuse detection. We will also compare these physical elder abuse victims to a matched comparison group of non-victimized older adults using Medicare claims. We will use machine learning approaches to extend our ability to identify patterns suggestive of potential physical elder abuse exposure. Describing unique patterns and associated costs of health care utilization among elder abuse victims may improve the ability of health care providers to identify and, ultimately, intervene and prevent victimization.

**Ethics and Dissemination:** This project has been reviewed and approved by the Weill Cornell Medicine Institutional Review Board, protocol #1807019417, with initial approval on August 1,

1  
2  
3 2018. We aim to disseminate our results in peer-reviewed journals, at national and international  
4  
5 conferences and among interested patient groups and the public.  
6  
7

8  
9 **Keywords:** elder abuse; elder mistreatment; health care utilization; machine learning; research  
10 protocol  
11  
12

13  
14  
15  
16  
17  
18  
19  
20  
21  
22  
23  
24  
25  
26  
27  
28  
29  
30  
31  
32  
33  
34  
35  
36  
37  
38  
39  
40  
41  
42  
43  
44  
45  
46  
47  
48  
49  
50  
51  
52  
53  
54  
55  
56  
57  
58  
59  
60

For peer review only

### Article Summary: Strengths and limitations of this study:

- We explore patterns of health care utilization and associated costs for known physical elder abuse victims, about common and serious phenomenon about which little is known
- We use Medicare claims data for a series of well-characterized, legally adjudicated cases of physical elder abuse to comprehensively examine victims' health care utilization before and after the date of abuse detection in comparison to non-victimized older adults algorithmically selected from Medicare claims
- We use machine learning approaches to better identify patterns suggestive of potential physical elder abuse exposure
- Though using legally adjudicated cases solves the important methodologic challenge of ensuring that case subjects are actually victims of abuse, these cases represent a small percentage of all elder abuse cases and their experience of abuse may differ in important ways from other victims
- Subjects must have been enrolled in Medicare Fee-for-Service rather than Medicare Advantage or another insurance for us to be able to examine their health care utilization



## Introduction

Elder abuse is common and has serious health consequences but is under-recognized and under-reported. As many as 10% of US older adults experience elder abuse each year.<sup>1-6</sup> This maltreatment may include physical abuse, sexual abuse, neglect, psychological abuse, or financial exploitation, and many victims suffer from multiple types of abuse concurrently.<sup>1-5</sup> Evidence suggests that elder abuse is associated with adverse health outcomes, including disability,<sup>7</sup> dementia,<sup>8</sup> depression,<sup>8</sup> and mortality.<sup>9-11</sup> Despite its frequency, many elder abuse victims endure it for years before having it discovered or dying. Studies suggest that as few as 1 in 24 cases of elder abuse is reported to the authorities,<sup>1,3,12</sup> and some of the associated morbidity and mortality is likely due to this delay in identification and intervention.<sup>13</sup>

As assessment by health care providers may represent the only outside contact for many older adults, so clinicians have a unique opportunity to identify suspected elder abuse and initiate intervention.<sup>14-20</sup> Elder abuse victims have increased rates of emergency department (ED) use,<sup>14,17</sup> hospitalization,<sup>21</sup> and nursing home placement.<sup>22,23</sup> Little is known, however, about the patterns of this increased utilization and associated costs.<sup>5,24</sup> Influential research in child abuse<sup>25-30</sup> and intimate partner violence<sup>31,32</sup> has focused on health care utilization before identification, highlighting that many victims had multiple previous visits for likely abuse-related issues, suggesting “missed opportunities” for identification and early intervention. Child abuse researchers have found that minor abusive injuries, “sentinel injuries,” are commonly found in children who are subsequently victims of severe child abuse but rare in those who aren’t.<sup>33,34</sup> Strategies are being developed to capitalize on these findings to prevent morbidity and mortality for victims. Additionally, research has found that health care costs were significantly higher for victims of child abuse and intimate partner violence both in the short-term<sup>35,36</sup> and long-term,<sup>35,37-40</sup> compared to costs incurred by non-victims. These increased costs represent a key

1  
2  
3 component of the overall economic burden of these phenomena,<sup>41-44</sup> and related research  
4  
5 findings have been critical in revealing the scope and impact of child abuse and intimate partner  
6  
7 violence and in driving policymaking decisions. We know of no analogous research in elder  
8  
9 abuse.  
10

11  
12 To help fill this gap in the literature, we describe here the protocol for a study designed to  
13  
14 explore in detail patterns of health care utilization and associated costs for known physical elder  
15  
16 abuse victims compared to non-victims using analytic techniques including machine learning.  
17  
18  
19  
20  
21  
22  
23  
24  
25  
26  
27  
28  
29  
30  
31  
32  
33  
34  
35  
36  
37  
38  
39  
40  
41  
42  
43  
44  
45  
46  
47  
48  
49  
50  
51  
52  
53  
54  
55  
56  
57  
58  
59  
60

## Methods and Analysis

### *Conceptual Framework and Hypotheses*

We hypothesize that various aspects of health care utilization are differentially affected by physical elder abuse victimization. Many issues related to physical elder abuse potentially increase ED/hospital utilization and reduce outpatient/primary care utilization. We have developed a conceptual framework (Figure 1) to explain this pattern. This framework is informed by a model for elder abuse research that members of our team developed as part of the National Institute on Aging (NIA) Workshop “Multiple Approaches to Understanding and Preventing Elder Abuse and Mistreatment: Prevention and Intervention.”<sup>45</sup>

As shown in Figure 1, we further hypothesize that physical elder abuse victims, due to their poor connection to primary care, will have increased utilization of EDs/hospitals for ambulatory care-sensitive conditions (ACSCs) and for non-urgent issues. ACSCs are conditions that, if treated in a timely fashion with adequate primary care and managed properly on an outpatient basis, should not advance to the point where an ED visit or hospitalization is required.<sup>46</sup> Measuring the rate of use of high intensity, high cost services to treat these conditions is common in health services research to assess access to and quality of primary care.<sup>46-49</sup> Similarly, use of the ED for non-urgent issues suggests inappropriate use in the absence of primary care.

We also hypothesize that physical elder abuse victims will have high rates of repeat ED visits and re-hospitalizations within short intervals. This results from poor connections to primary care and poor adherence to outpatient follow-up care recommendations.<sup>50-53</sup> We anticipate that physical elder abuse victims will also have higher use of the ED/hospital for issues directly related to abuse, including presentation for injuries and use of imaging to evaluate

1  
2  
3 specific injury types. Based on anecdotal experiences by elder abuse experts,<sup>54</sup> we also  
4  
5 hypothesize that, compared to other older adults, physical elder abuse victims will more likely be  
6  
7 seen at multiple EDs and hospitals. This “hospital hopping” often occurs to avoid abuse  
8  
9 detection.<sup>55</sup>  
10  
11

12 Conversely, we hypothesize that poor access to and less frequent use of primary care will  
13  
14 be associated with more primary care provider changes, lower receipt of preventative services,  
15  
16 and worse continuity of care. More frequent changes in primary care providers result in fractured  
17  
18 care and have been shown in previous claims-based research to be associated with child abuse.<sup>56</sup>  
19  
20 Receipt of preventative services has been used in previous studies to assess level of primary care  
21  
22 utilization among Medicare beneficiaries and has been shown to be lower in older adults with  
23  
24 low primary care access including excess alcohol use and poor health literacy.<sup>57-61</sup> We anticipate  
25  
26 that physical elder abuse victims will have lower continuity of care, which has been shown in  
27  
28 Medicare beneficiaries to be associated with increased rates of frequent ED use.<sup>62</sup> Continuity of  
29  
30 care assesses the dispersion of outpatient evaluation and management visits, examining how  
31  
32 many unique doctors a patient visits within a specific timeframe.<sup>63</sup>  
33  
34  
35  
36  
37

38 And finally, we also hypothesize that victims of physical elder abuse, partially due to  
39  
40 poor connection to primary care, will have poorer adherence to medications for chronic  
41  
42 conditions, such as diabetes medications and anti-hypertensives, which has been shown to impact  
43  
44 high intensity healthcare utilization and cost.<sup>64,65</sup>  
45  
46  
47  
48

### 49 *Study Design*

50  
51 In this retrospective study, we will obtain Medicare claims data for a series of legally  
52  
53 adjudicated cases of physical elder abuse to comprehensively examine victims’ health care  
54  
55  
56  
57  
58  
59  
60

1  
2  
3 utilization before and after the date of abuse detection. We will also compare physical elder  
4  
5 abuse victims to other non-victimized older adults. We will algorithmically select this  
6  
7 comparison group from Medicare claims data to be matched to the physical elder abuse victims.  
8  
9

10 We will compare victims' ED/hospital and outpatient primary care utilization to that of  
11  
12 the control groups. We will use machine learning approaches to extend our ability to identify  
13  
14 patterns suggestive of potential physical elder abuse exposure.  
15  
16

17 This project has been reviewed and approved by the Weill Cornell Medicine Institutional  
18  
19 Review Board, protocol #1807019417 (initially approved on August 1, 2018). The Institutional  
20  
21 Review Board approved waiving the requirement to obtain informed consent from subjects in  
22  
23 this retrospective study.  
24  
25  
26  
27

### 28 *Study Subjects*

29  
30 For this research, we plan to use a well-characterized series of 204 legally adjudicated  
31  
32 cases of physical elder abuse from Brooklyn, New York and Seattle, Washington. The  
33  
34 methodologic advantage of this series of cases is unique: because the perpetrators have pled  
35  
36 guilty or been convicted, the presence of elder abuse has been verified and the time of detection  
37  
38 is known. This dataset includes rich information about the abuse victims and perpetrators as well  
39  
40 as details about the abuse history, when and how it was detected, and the surrounding  
41  
42 circumstances. It was constructed using information from the legal case files, including: medical  
43  
44 records, descriptions of Emergency Medical Services personnel and police interactions with the  
45  
46 victim and perpetrator, victim statements, adult protective services files, court documents, and  
47  
48 photographs of injuries.  
49  
50  
51  
52  
53  
54  
55  
56  
57  
58  
59  
60

### *Medicare Data Linkage*

We will link these legally adjudicated cases to Medicare claims data using identifying information including social security numbers and/or a combination of last name, date of birth and residential ZIP code. Fee-for-service Medicare data is the largest single repository of patient health care data for US older adults,<sup>66</sup> offering comprehensive information on utilization of a broad range of health care services for continuously enrolled individuals. Medicare claims data has been used successfully to analyze health care utilization and costs and to inform interventions and policies for a variety of chronic diseases.<sup>67-70</sup> Additionally, claims data have been used to examine the impact on utilization and cost of socio-medical issues<sup>71,72</sup> including excessive alcohol use.<sup>47,57,73</sup> Medicare claims data have also been employed to provide insight into the characteristics of frequent utilizers of specific health services, such as the ED<sup>62,74</sup> and hospital.<sup>75</sup>

We plan to examine Medicare claims data for each case from 3 years before to 3 years after detection of elder abuse and will compare to controls. We will use files including the Master Beneficiary Summary File (enrollee demographics, monthly enrollment information, chronic conditions, annual summary of costs and service utilization), Medicare Provider Analysis and Review (MEDPAR) file (events of inpatient hospital and skilled nursing facility stays), Outpatient Claims, Carrier File (claims of physician services), Home Health Claims, and the Part D (prescription drug) Event File.<sup>76</sup>

### *Measures*

We describe the key measures of utilization we plan to use in Table 1. We plan to focus primarily on utilization of high-intensity, high cost health care services including ED visits and hospitalizations by elder abuse victims and non-victim control subjects. We will examine overall

1  
2  
3 utilization of these services and will also look at several characteristics of this utilization. We  
4  
5 will examine the frequency of ED use and hospitalization among victims and compare utilization  
6  
7 of these services of victims and non-victim controls. We will focus on injury-related utilization,  
8  
9 using ICD codes and external cause of injury codes<sup>77,78</sup> similar to previous work in child  
10  
11 abuse.<sup>56,79</sup> We will also examine frequent ED use, defined as 4 or more visits in a year, the cut-  
12  
13 off accepted in the literature and used in previous Medicare research.<sup>62,74,80,81</sup> We plan to  
14  
15 measure the number of potentially avoidable low-urgency ED visits<sup>82,83</sup> as well as ED visits and  
16  
17 hospitalizations for ambulatory care-sensitive conditions (ACSCs). We will define low urgency  
18  
19 visits similar to previous literature<sup>82,83</sup> using Medicare Current Procedural Terminology (CPT)  
20  
21 billing codes (99281, 99282) indicating low severity and no additional procedures billed. For this  
22  
23 research, we will use the 11 ACSCs established for use in Medicare data.<sup>46</sup> We will also examine  
24  
25 repeat ED visits and re-hospitalizations within short intervals. Consistent with previous research,  
26  
27 we will examine visits to the ED within 3 days, 7 days, and 30 days of initial visit<sup>50,52</sup> as well as  
28  
29 repeat hospitalizations within 30 days and 90 days of initial hospitalization.<sup>51</sup> Additionally, we  
30  
31 will explore use of multiple EDs and hospitals.  
32  
33  
34  
35  
36

37  
38 For outpatient care, we will examine the number of primary care visits and focus on  
39  
40 injury-related visits for victims and controls. We will also examine changes in primary care  
41  
42 providers. We plan to evaluate the continuity of care using the widely employed Continuity of  
43  
44 Care Index (COCI).<sup>63</sup> Given that the COCI requires multiple outpatient visits to be meaningfully  
45  
46 calculated, we will only examine this variable for subjects with three or more outpatient visits,  
47  
48 consistent with previous literature.<sup>62,84,85</sup> We will measure whether physical elder abuse victims  
49  
50 and control subjects received preventative services, including influenza vaccination, glaucoma  
51  
52 screening, pneumonia vaccination, and mammogram.<sup>57</sup> We plan to examine adherence to  
53  
54  
55  
56  
57  
58  
59  
60

1  
2  
3 medication for chronic conditions. To do this, we will measure the proportion of days  
4 covered<sup>86,87</sup> and determine adherent vs. non-adherent using 0.80 as a cut-off, a common research  
5  
6 strategy in administrative claims data.<sup>87,88</sup>  
7  
8  
9

10 We will examine demographic data, including age, gender, and race/ethnicity. We will  
11 also use claims data for key health-related co-variables to allow for further characterization of  
12 physical elder abuse victims and comparison of sub-groups. These include medical co-  
13 morbidities, psychiatric co-morbidities, dementia, and frailty. For medical co-morbidities, we  
14 plan to use chronic condition indicators within the Medicare Master Beneficiary file, and we will  
15 use psychiatric diagnoses within claims data. We will use an established approach<sup>35,89,90</sup> to  
16 identify dementia. To identify frailty, we will use a recently-developed algorithm designed for  
17 use in Medicare claims data.<sup>91,92</sup>  
18  
19  
20  
21  
22  
23  
24  
25  
26  
27  
28  
29  
30

### 31 *Non-Victim Control Subjects*

32  
33 We will select a group of non-victim control subjects matched to the cases on age, race,  
34 gender, and residential ZIP code at the time of detection of each elder abuse case. This control  
35 group will allow us to compare health care utilization of elder abuse victims with that of a  
36 general older adult population. We will construct a second control group who, in addition to  
37 being matched to the cases on age, race, gender, and ZIP code, visited the ED for an  
38 unintentional injury within one week of the victim's abuse detection by law enforcement. This  
39 second control group will allow us to explore potential differences between older adults  
40 presenting to the ED for abuse-related injuries and those presenting with unintentional injuries, a  
41 key focus of our previous research.<sup>93,94</sup> Findings from such comparisons may assist health care  
42 providers, particularly in the ED, to differentiate between physical elder abuse and unintentional  
43  
44  
45  
46  
47  
48  
49  
50  
51  
52  
53  
54  
55  
56  
57  
58  
59  
60



1  
2  
3 injuries, informing future development of clinical algorithms to assist in this identification.  
4  
5 Because we may have more controls than needed meeting the selection criteria within the first  
6  
7 control cohort outlined above, we will further conduct propensity score matching to select  
8  
9 controls that more closely match with the cases.  
10  
11

12 We recognize that older adults selected as control subjects may actually be victims of  
13  
14 physical elder abuse. To minimize the likelihood of this, we will ensure that all selected controls  
15  
16 have never received any elder maltreatment-related diagnosis within Medicare claims data.  
17  
18

### 19 20 21 *Focus on Physical Abuse* 22

23  
24 Though physical elder abuse may occur less frequently than other types of mistreatment,  
25  
26 we think that focusing on these cases is a strength of our approach. Researchers have recognized  
27  
28 that elder mistreatment is not a monolithic phenomenon and that etiologies, victim and  
29  
30 perpetrator characteristics, risk factors, clinical features, and sequelae likely differ in important  
31  
32 ways between mistreatment types.<sup>95</sup> This is an important reason that previous research has  
33  
34 yielded inconsistent findings and little clinically useful information is likely that heterogeneous  
35  
36 cases were analyzed together. We have chosen to focus on physical abuse because this violent  
37  
38 mistreatment may be particularly dangerous for an older adult. Our research focuses on health  
39  
40 care utilization for abuse victims and the potential for improving early identification in health  
41  
42 care settings such as the emergency department. Given that physical abuse often causes acute  
43  
44 injury which may trigger health care visits more commonly than other types of elder  
45  
46 mistreatment, health care providers may have a particular opportunity to identify it. Linking  
47  
48 known elder abuse cases to Medicare claims data to describe rates and patterns of health care  
49  
50  
51  
52  
53  
54  
55  
56  
57  
58  
59  
60

1  
2  
3 utilization may also be used to examine victims of other types of elder mistreatment, though, and  
4  
5 we plan to explore this in the future.  
6

### 7 *Analysis*

8  
9  
10 We will conduct descriptive longitudinal analysis of health care utilization up to 3 years  
11  
12 before and 3 years after the detection of elder abuse (and among control cohorts). For each elder  
13  
14 abuse case, we will determine the calendar month in which the case was detected (the “index  
15  
16 month”). We will then group months before and after the index month into 3-month  
17  
18 intervals/quarters. Our unit of analysis will be patient-quarter. We will plot measured outcomes  
19  
20 over time (centered around the index month) and visualize level of utilization in time blocks in  
21  
22 relationship to the index month.  
23  
24  
25

26 We will compare utilization between physical elder abuse cases and non-victim control  
27  
28 subjects using the key measures described above, focusing on identifying important differences.  
29  
30 Comparisons will also specifically focus on rates of radiographic utilization of maxillofacial CT  
31  
32 scan and forearm x-rays as well as diagnoses including acute or chronic facial or chronic ulnar  
33  
34 fracture, and chronic rib fracture as they have been found to be potential predictors of physical  
35  
36 elder abuse.<sup>96</sup> We will compare total costs between cases and controls and then examine in detail  
37  
38 contributing costs associated with each type of utilization.  
39  
40  
41

42 We will also conduct statistical modelling of longitudinal healthcare utilization outcomes  
43  
44 to estimate adjusted differences between physical elder abuse victims and non-victims at various  
45  
46 time points before and after the index month. For example, for the dichotomous outcome of any  
47  
48 ED or inpatient admission in a quarter, we will estimate a mixed logistic regression where major  
49  
50 covariates include victim status, time (relative to index month), and interaction of victim status  
51  
52 and time, controlling for individual demographics and comorbidities. Random effects will be  
53  
54  
55  
56  
57  
58  
59  
60

1  
2  
3 specified at the patient level (to account for repeated measures of the same individual) and zip  
4 code (to account for clustering of patients within the same zip code) levels.  
5  
6

7  
8 We have conducted power calculations with these cases and controls, incorporating  
9 assumptions about Medicare linking rate (50% of cases), number of quarters of data contributed  
10 by each individual (6 quarters), percentage of subjects with  $\geq 1$  ED visit in a quarter (12% of elder  
11 abuse victims and 6% of controls), and intra cluster correlation (0.2, to account for clustering of  
12 quarters within the same individual). Using these assumptions, we have a power of 0.82, which  
13 is adequate to identify important differences in utilization between cases and controls.  
14  
15  
16  
17  
18  
19  
20  
21  
22  
23

### 24 *Using Machine Learning*

25  
26 The comparative statistical analysis described above will illuminate the trajectories of  
27 health care use one type at a time. It lacks the ability to integrate multi-dimensional data that,  
28 combined, forms unique patterns of care. Recent innovations in machine learning make it  
29 possible to use vast amounts of data, such as service utilization, diagnoses received, and  
30 procedures performed, to identify sequences and mix of clinical events likely to lead to particular  
31 outcomes or suggestive of an underlying disease process for different cohorts of patients.<sup>97-102</sup>  
32  
33 For example, sequential pattern mining has been used in child abuse to examine patterns of  
34 services provided to victims.<sup>103,104</sup> To supplement the proposed statistical analysis, we propose to  
35 search for features within claims data that may be suggestive that an older adult is a victim of  
36 abuse. We will use Sequential PAttern Discovery using Equivalence classes (SPADE),<sup>105</sup> a well-  
37 established algorithm which identifies patterns that are observed more than a user-defined  
38 frequency threshold in a cohorts' sequences of event. In addition, we will use Markov  
39 modeling<sup>106</sup> to identify the probabilities of observed patterns and associated underlying status of  
40  
41  
42  
43  
44  
45  
46  
47  
48  
49  
50  
51  
52  
53  
54  
55  
56  
57  
58  
59  
60

1  
2  
3 abuse to better distinguish patterns that are unique to elderly abused patients. We may find, for  
4  
5 example, that a significant percentage of abuse victims have two ED visits and a hospitalization  
6  
7 within a 3 month period and receive forearm x-rays and are diagnosed with a fracture, but this  
8  
9 pattern is never seen in controls.

### 11 12 *Discussion*

13  
14 This ongoing work will address a significant gap in current knowledge about elder abuse  
15  
16 by improving understanding of how physical abuse victims use health care services differently  
17  
18 than non-victims as well as associated costs. We anticipate insights from our findings will  
19  
20 generate hypotheses that may be tested in future studies in different populations and among  
21  
22 victims of different types of elder mistreatment. We also expect that this work will lead to  
23  
24 additional uses of claims data to explore the health consequences of elder abuse and to identify  
25  
26 utilization patterns with “red flags” suggestive of exposure. Ultimately, we anticipate that  
27  
28 knowledge gleaned will support the future development of a health informatics tool to identify  
29  
30 potential victims.  
31  
32  
33

### 34 35 *Limitations*

36  
37 An important limitation of our approach is the use of legally adjudicated cases. Though  
38  
39 using this source solves the important methodologic challenge of ensuring that case subjects are  
40  
41 actually victims of abuse, legally adjudicated cases represent a small percentage of all cases, and  
42  
43 abuse victims included may differ in important ways from other victims. They may have  
44  
45 experienced more acute or severe abuse allowing identification, and subtle cases of abuse that  
46  
47 are more challenging to detect may not have been included. Additionally, other circumstances  
48  
49 surrounding the case including the availability of evidence, the willingness of the victim to  
50  
51 participate, jurisdiction’s practice pattern may have impacted the decision to prosecute the  
52  
53 perpetrator, significantly reducing potential generalizability. An important challenge in previous  
54  
55  
56  
57  
58  
59  
60

1  
2  
3 studies has been accurately classifying subjects as victims of mistreatment. This has likely  
4 contributed to inconsistent research findings. Our new potential approach will generate  
5 trustworthy results that may identify patterns and generate hypotheses that may be tested. We  
6 anticipate that rigorous studies such as ours will lay the necessary groundwork for future studies  
7 focused on identifying and examining more subtle cases.  
8  
9

10  
11 Also, our research strategy relies on linking to Medicare Fee-for-Service records. If  
12 subjects were covered by Medicare Advantage or otherwise not covered by Medicare Fee-For-  
13 Service for any period, information about their health care utilization would not be available  
14 during that period. We have incorporated this potential into our power calculation assumptions,  
15 however, and believe we will be able to identify important differences in utilization.  
16  
17

18  
19 Another limitation is that selected control subjects may actually be unidentified cases,  
20 reducing the accuracy of our conclusions. Although we believe that machine learning techniques  
21 have enormous potential to find subtle patterns, it is possible that we will not identify any that  
22 are clinically identifiable or meaningful. Despite these potential limitations, we believe this  
23 research offers a unique opportunity to use a large series of well-characterized cases of physical  
24 elder abuse to help us understand the health-related markers that can be used to more validly  
25 predict elder abuse, and thereby prevent it.  
26  
27

### 28 29 30 31 32 33 34 35 36 37 38 39 40 41 42 *Conclusion* 43

44 Improved understanding of patterns and associated costs of health care utilization among  
45 elder abuse victims, which likely differs substantially from that of other older adults, is  
46 potentially very valuable. It may improve the ability of health care providers to identify,  
47 intervene, and prevent victimization. Further, it may inform policy changes to reduce costs and  
48 help this vulnerable population. The research described here represents an important step in  
49  
50  
51  
52  
53  
54  
55  
56  
57  
58  
59  
60

1  
2  
3 exploring the potential of examining health care utilization to provide insight into elder abuse  
4  
5 and how to address it.  
6  
7  
8  
9  
10  
11  
12  
13  
14  
15  
16  
17  
18  
19  
20  
21  
22  
23  
24  
25  
26  
27  
28  
29  
30  
31  
32  
33  
34  
35  
36  
37  
38  
39  
40  
41  
42  
43  
44  
45  
46  
47  
48  
49  
50  
51  
52  
53  
54  
55  
56  
57  
58  
59  
60

For peer review only

### **Ethics and Dissemination**

This project has been reviewed and approved by the Weill Cornell Medicine Institutional Review Board, protocol #1807019417, with initial approval on August 1, 2018. We aim to disseminate our results in peer-reviewed journals, at national and international conferences and among interested patient groups and the public.

#### *Patient and public involvement*

We plan to involve older adults including victims of elder mistreatment in the reporting and dissemination for this this research.

## References

1. Acierno R, Hernandez MA, Amstadter AB, et al. Prevalence and correlates of emotional, physical, sexual, and financial abuse and potential neglect in the United States: the National Elder Mistreatment Study. *Am J Public Health* 2010;100:292-7.
2. Lachs MS, Pillemer K. Elder abuse. *Lancet* 2004;364:1263-72.
3. Under the Radar: New York State Elder Abuse Prevalence Study: Self-Reported Prevalence and Documented Case Surveys 2012. (Accessed February 10, 2020, at <https://ocfs.ny.gov/main/reports/Under%20the%20Radar%2005%2012%2011%20final%20report.pdf>)
4. National Research Council. Elder mistreatment: Abuse, neglect and exploitation in an aging America. Washington, DC: The National Academies Press; 2003.
5. National Center for Elder Abuse. The Elder Justice Roadmap: A Stakeholder Initiative to Respond to an Emerging Health, Justice, Financial, and Social Crisis. (Accessed February 10, 2020, at <https://www.justice.gov/file/852856/download>)
6. Lachs MS, Pillemer KA. Elder abuse. *N Engl J Med* 2015;373:1947-56.
7. Schofield MJ, Powers JR, Loxton D. Mortality and disability outcomes of self-reported elder abuse: a 12-year prospective investigation. *J Am Geriatr Soc* 2013;61:679-85.
8. Dyer CB, Pavlik VN, Murphy KP, Hyman DJ. The high prevalence of depression and dementia in elder abuse or neglect. *J Am Geriatr Soc* 2000;48:205-8.
9. Lachs MS, Williams CS, O'Brien S, Pillemer KA, Charlson ME. The mortality of elder mistreatment. *JAMA* 1998;280:428-32.
10. Dong XQ, Simon MA, Beck TT, et al. Elder abuse and mortality: the role of psychological and social wellbeing. *Gerontology* 2011;57:549-58.



- 1  
2  
3 11. Baker MW, LaCroix AZ, Wu C, Cochrane BB, Wallace R, Woods NF. Mortality risk  
4 associated with physical and verbal abuse in women aged 50 to 79. *J Am Geriatr Soc*  
5  
6 2009;57:1799-809.  
7
- 8  
9  
10 12. Pillemer K, Finkelhor D. The prevalence of elder abuse: a random sample survey.  
11  
12 *Gerontologist* 1988;28:51-7.  
13
- 14 13. Murphy K, Waa S, Jaffer H, Sauter A, Chan A. A literature review of findings in physical  
15  
16 elder abuse. *Can Assoc Radiol J* 2013;64:10-4.  
17
- 18 14. Lachs MS, Williams CS, O'Brien S, et al. ED use by older victims of family violence. *Ann*  
19  
20 *Emerg Med* 1997;30:448-54.  
21
- 22 15. Bond MC, Butler KH. Elder abuse and neglect: definitions, epidemiology, and approaches  
23  
24 to emergency department screening. *Clin Geriatr Med* 2013;29:257-73.  
25
- 26 16. Geroff AJ, Olshaker JS. Elder abuse. *Emerg Med Clin North Am* 2006;24:491-505.  
27
- 28 17. Dong X, Simon MA. Association between elder abuse and use of ED: findings from the  
29  
30 Chicago Health and Aging Project. *Am J Emerg Med* 2013;31:693-8.  
31
- 32 18. Friedman LS, Avila S, Tanouye K, Joseph K. A case-control study of severe physical abuse  
33  
34 of older adults. *J Am Geriatr Soc* 2011;59:417-22.  
35
- 36 19. Heyborne RD. Elder abuse: keeping the unthinkable in the differential. *Acad Emerg Med*  
37  
38 2007;14:566-7.  
39
- 40 20. Chan KL, Choi WM, Fong DY, Chow CB, Leung M, Ip P. Characteristics of family  
41  
42 violence victims presenting to emergency departments in Hong Kong. *J Emerg Med*  
43  
44 2013;44:249-58.  
45
- 46 21. Dong X, Simon MA. Elder abuse as a risk factor for hospitalization in older persons. *JAMA*  
47  
48 *Intern Med* 2013;173:911-7.  
49  
50  
51  
52  
53  
54  
55  
56  
57  
58  
59  
60

- 1
  - 2
  - 3
  - 4
  - 5
  - 6
  - 7
  - 8
  - 9
  - 10
  - 11
  - 12
  - 13
  - 14
  - 15
  - 16
  - 17
  - 18
  - 19
  - 20
  - 21
  - 22
  - 23
  - 24
  - 25
  - 26
  - 27
  - 28
  - 29
  - 30
  - 31
  - 32
  - 33
  - 34
  - 35
  - 36
  - 37
  - 38
  - 39
  - 40
  - 41
  - 42
  - 43
  - 44
  - 45
  - 46
  - 47
  - 48
  - 49
  - 50
  - 51
  - 52
  - 53
  - 54
  - 55
  - 56
  - 57
  - 58
  - 59
  - 60
22. Lachs MS, Williams CS, O'Brien S, Pillemer KA. Adult protective service use and nursing home placement. *Gerontologist* 2002;42:734-9.
23. Dong X, Simon MA. Association between reported elder abuse and rates of admission to skilled nursing facilities: findings from a longitudinal population-based cohort study. *Gerontology* 2013;59:464-72.
24. Mouton CP, Rodabough RJ, Rovi SL, et al. Prevalence and 3-year incidence of abuse among postmenopausal women. *Am J Public Health* 2004;94:605-12.
25. Jackson AM, Deye KP, Halley T, et al. Curiosity and critical thinking: identifying child abuse before it is too late. *Clin Pediatr* 2015;54:54-61.
26. Jenny C, Hymel KP, Ritzen A, Reinert SE, Hay TC. Analysis of missed cases of abusive head trauma. *JAMA* 1999;281:621-6.
27. King WK, Kiesel EL, Simon HK. Child abuse fatalities: are we missing opportunities for intervention? *Pediatr Emerg Care* 2006;22:211-4.
28. Letson MM, Cooper JN, Deans KJ, et al. Prior opportunities to identify abuse in children with abusive head trauma. *Child Abuse Negl* 2016;60:36-45.
29. Ravichandiran N, Schuh S, Bejuk M, et al. Delayed identification of pediatric abuse-related fractures. *Pediatrics* 2010;125:60-6.
30. Thorpe EL, Zuckerbraun NS, Wolford JE, Berger RP. Missed opportunities to diagnose child physical abuse. *Pediatr Emerg Care* 2014;30:771-6.
31. Kothari CL, Rhodes KV. Missed opportunities: emergency department visits by police-identified victims of intimate partner violence. *Ann Emerg Med* 2006;47:190-9.
32. Willson P, Cesario S, Fredland N, et al. Primary healthcare provider's lost opportunity to help abused women. *J Am Acad Nurse Pract* 2001;13:565-70.

- 1
- 2
- 3 33. Lindberg DM, Beaty B, Juarez-Colunga E, Wood JN, Runyan DK. Testing for abuse in
- 4 children with sentinel injuries. *Pediatrics* 2015;136:831-8.
- 5
- 6
- 7
- 8 34. Sheets LK, Leach ME, Koszewski IJ, Lessmeier AM, Nugent M, Simpson P. Sentinel
- 9 injuries in infants evaluated for child physical abuse. *Pediatrics* 2013;131:701-7.
- 10
- 11
- 12 35. Brown DS, Fang X, Florence CS. Medical costs attributable to child maltreatment a
- 13 systematic review of short- and long-term effects. *Am J Prev Med* 2011;41:627-35.
- 14
- 15
- 16
- 17 36. Rovi S, Chen PH, Johnson MS. The economic burden of hospitalizations associated with
- 18 child abuse and neglect. *Am J Public Health* 2004;94:586-90.
- 19
- 20
- 21 37. Florence C, Brown DS, Fang X, Thompson HF. Health care costs associated with child
- 22 maltreatment: impact on medicaid. *Pediatrics* 2013;132:312-8.
- 23
- 24
- 25
- 26 38. Jones AS, Dienemann J, Schollenberger J, et al. Long-term costs of intimate partner
- 27 violence in a sample of female HMO enrollees. *Womens Health Issues* 2006;16:252-61.
- 28
- 29
- 30 39. Peterson C, Xu L, Florence C, et al. The medical cost of abusive head trauma in the United
- 31 States. *Pediatrics* 2014;134:91-9.
- 32
- 33
- 34
- 35 40. Miller TR, Steinbeigle R, Lawrence BA, et al. Lifetime cost of abusive head trauma at ages
- 36 0-4, USA. *Prev Sci* 2017.
- 37
- 38
- 39
- 40 41. Fang X, Brown DS, Florence CS, Mercy JA. The economic burden of child maltreatment in
- 41 the United States and implications for prevention. *Child Abuse Negl* 2012;36:156-65.
- 42
- 43
- 44 42. Max W, Rice DP, Finkelstein E, Bardwell RA, Leadbetter S. The economic toll of intimate
- 45 partner violence against women in the United States. *Violence Vict* 2004;19:259-72.
- 46
- 47
- 48
- 49 43. Thielen FW, Ten Have M, de Graaf R, et al. Long-term economic consequences of child
- 50 maltreatment: a population-based study. *Eur Child Adolesc Psychiatry* 2016;25:1297-305.
- 51
- 52
- 53
- 54
- 55
- 56
- 57
- 58
- 59
- 60

- 1  
2  
3 44. Yang J, Miller TR, Zhang N, LeHew B, Peek-Asa C. Incidence and cost of sexual violence  
4  
5 in Iowa. *Am J Prev Med* 2014;47:198-202.  
6
- 7  
8 45. Teresi JA, Burnes D, Skowron EA, et al. State of the science on prevention of elder abuse  
9  
10 and lessons learned from child abuse and domestic violence prevention: Toward a  
11  
12 conceptual framework for research. *J Elder Abuse Negl* 2016;28:263-300.  
13
- 14  
15 46. McCall N. Centers for Medicare and Medicaid Services. Investigation of Increasing Rates of  
16  
17 Hospitalization for Ambulatory Care Sensitive Conditions Among Medicare Fee-for-Service  
18  
19 Beneficiaries. (Accessed on February 10, 2020, at: [https://www.cms.gov/Research-](https://www.cms.gov/Research-Statistics-Data-and-Systems/Statistics-Trends-and-Reports/Reports/Downloads/McCall_2004_3.pdf)  
20  
21 [Statistics-Data-and-Systems/Statistics-Trends-and-](https://www.cms.gov/Research-Statistics-Data-and-Systems/Statistics-Trends-and-Reports/Reports/Downloads/McCall_2004_3.pdf)  
22  
23 [Reports/Reports/Downloads/McCall\\_2004\\_3.pdf](https://www.cms.gov/Research-Statistics-Data-and-Systems/Statistics-Trends-and-Reports/Reports/Downloads/McCall_2004_3.pdf))  
24  
25
- 26  
27 47. Merrick ES, Hodgkin D, Garnick DW, et al. Older adults' inpatient and emergency  
28  
29 department utilization for ambulatory-care-sensitive conditions: relationship with alcohol  
30  
31 consumption. *J Aging Health* 2011;23:86-111.  
32
- 33  
34 48. Brownell J, Wang J, Smith A, Stephens C, Hsia RY. Trends in emergency department visits  
35  
36 for ambulatory care sensitive conditions by elderly nursing home residents, 2001 to 2010.  
37  
38 *JAMA Intern Med* 2014;174:156-8.  
39
- 40  
41 49. Carter MW, Datti B, Winters JM. ED visits by older adults for ambulatory care-sensitive  
42  
43 and supply-sensitive conditions. *Am J Emerg Med* 2006;24:428-34.  
44
- 45  
46 50. Duseja R, Bardach NS, Lin GA, et al. Revisit rates and associated costs after an emergency  
47  
48 department encounter: a multistate analysis. *Ann Intern Med* 2015;162:750-6.  
49
- 50  
51 51. Jencks SF, Williams MV, Coleman EA. Rehospitalizations among patients in the Medicare  
52  
53 fee-for-service program. *N Engl J Med* 2009;360:1418-28.  
54  
55  
56  
57  
58  
59  
60

- 1
- 2
- 3 52. Liu SW, Obermeyer Z, Chang Y, Shankar KN. Frequency of ED revisits and death among
- 4
- 5 older adults after a fall. *Am J Emerg Med* 2015;33:1012-8.
- 6
- 7
- 8 53. Vashi AA, Fox JP, Carr BG, et al. Use of hospital-based acute care among patients recently
- 9
- 10 discharged from the hospital. *JAMA* 2013;309:364-71.
- 11
- 12
- 13 54. Ahmad M, Lachs MS. Elder abuse and neglect: what physicians can and should do. *Clev*
- 14
- 15 *Clin J Med* 2002;69:801-8.
- 16
- 17 55. Rosen T, Stern ME, Elman A, Mulcare MR. Identifying and initiating intervention for elder
- 18
- 19 abuse and neglect in the Emergency Department. *Clin Geriatr Med* 2018;34:435-51.
- 20
- 21
- 22 56. Friedlaender EY, Rubin DM, Alpern ER, Mandell DS, Christian CW, Alessandrini EA.
- 23
- 24 Patterns of health care use that may identify young children who are at risk for
- 25
- 26 maltreatment. *Pediatrics* 2005;116:1303-8.
- 27
- 28
- 29 57. Merrick EL, Hodgkin D, Garnick DW, et al. Unhealthy drinking patterns and receipt of
- 30
- 31 preventive medical services by older adults. *J Gen Intern Med* 2008;23:1741-8.
- 32
- 33
- 34 58. Asch SM, Sloss EM, Hogan C, Brook RH, Kravitz RL. Measuring underuse of necessary
- 35
- 36 care among elderly Medicare beneficiaries using inpatient and outpatient claims. *JAMA*
- 37
- 38 2000;284:2325-33.
- 39
- 40
- 41 59. Klabunde CN, Meissner HI, Wooten KG, Breen N, Singleton JA. Comparing colorectal
- 42
- 43 cancer screening and immunization status in older americans. *Am J Prev Med* 2007;33:1-8.
- 44
- 45 60. Ozminkowski RJ, Goetzel RZ, Shechter D, Stapleton DC, Baser O, Lapin P. Predictors of
- 46
- 47 preventive service use among Medicare beneficiaries. *Health Care Financ Rev* 2006;27:5-
- 48
- 49 23.
- 50
- 51
- 52
- 53
- 54
- 55
- 56
- 57
- 58
- 59
- 60

- 1  
2  
3 61. Scott TL, Gazmararian JA, Williams MV, Baker DW. Health literacy and preventive health  
4 care use among Medicare enrollees in a managed care organization. *Med Care* 2002;40:395-  
5 404.  
6  
7
- 8  
9  
10 62. Colligan EM, Pines JM, Colantuoni E, Wolff JL. Factors Associated With Frequent  
11 Emergency Department Use in the Medicare Population. *Medical Care Res Rev*  
12 2017;73:311-327.  
13  
14
- 15 63. Bice TW, Boxerman SB. A quantitative measure of continuity of care. *Med Care*  
16 1977;15:347-9.  
17  
18
- 19 64. Jha AK, Aubert RE, Yao J, Teagarden JR, Epstein RS. Greater adherence to diabetes drugs  
20 is linked to less hospital use and could save nearly \$5 billion annually. *Health Aff*  
21 (Millwood) 2012;31:1836-46.  
22  
23
- 24 65. Roebuck MC, Liberman JN, Gemmill-Toyama M, Brennan TA. Medication adherence leads  
25 to lower health care use and costs despite increased drug spending. *Health Aff (Millwood)*  
26 2011;30:91-9.  
27  
28
- 29 66. Mues KE, Liede A, Liu J, et al. Use of the Medicare database in epidemiologic and health  
30 services research: a valuable source of real-world evidence on the older and disabled  
31 populations in the US. *Clin Epidemiol* 2017;9:267-77.  
32  
33
- 34 67. Chen J, Hsieh AF, Dharmarajan K, Masoudi FA, Krumholz HM. National trends in heart  
35 failure hospitalization after acute myocardial infarction for Medicare beneficiaries: 1998-  
36 2010. *Circulation* 2013;128:2577-84.  
37  
38
- 39 68. Fitch K, Pelizzari PM, Pyenson B. Inpatient Utilization and Costs for Medicare Fee-for-  
40 Service Beneficiaries with Heart Failure. *Am Health Drug Benefits* 2016;9:96-104.  
41  
42  
43  
44  
45  
46  
47  
48  
49  
50  
51  
52  
53  
54  
55  
56  
57  
58  
59  
60

- 1  
2  
3 69. Genao L, Durheim MT, Mi X, Todd JL, Whitson HE, Curtis LH. Early and Long-term  
4 Outcomes of Older Adults after Acute Care Encounters for Chronic Obstructive Pulmonary  
5 Disease Exacerbation. *Ann Am Thorac Soc* 2015;12:1805-12.  
6  
7  
8  
9  
10 70. Wetmore JB, Peng Y, Jackson S, Matlon TJ, Collins AJ, Gilbertson DT. Patient  
11 characteristics, disease burden, and medication use in stage 4 - 5 chronic kidney disease  
12 patients. *Clin Nephrol* 2016;85:101-11.  
13  
14  
15  
16  
17 71. Baicker K, Chandra A, Skinner JS, Wennberg JE. Who you are and where you live: how  
18 race and geography affect the treatment of medicare beneficiaries. *Health Aff*  
19 (Millwood):VAR33-44.  
20  
21  
22  
23  
24 72. Joynt KE, Orav EJ, Jha AK. Thirty-day readmission rates for Medicare beneficiaries by race  
25 and site of care. *JAMA* 2011;305:675-81.  
26  
27  
28  
29 73. Merrick EL, Horgan CM, Hodgkin D, et al. Unhealthy drinking patterns in older adults:  
30 prevalence and associated characteristics. *J Am Geriatr Soc* 2008;56:214-23.  
31  
32  
33 74. Colligan EM, Pines JM, Colantuoni E, Howell B, Wolff JL. Risk Factors for Persistent  
34 Frequent Emergency Department Use in Medicare Beneficiaries. *Ann Emerg Med*  
35 2016;67:721-9.  
36  
37  
38  
39  
40 75. Phongtankuel V, Johnson P, Reid MC, et al. Risk factors for hospitalization of home  
41 hospice enrollees. *Am J Hosp Palliat Care* 2016:1049909116659439.  
42  
43  
44  
45 76. ResDAC Research Data Assistance Center. Data Availability. (Accessed on February 10,  
46 2020 at <https://www.resdac.org/cms-data/file-availability>.)  
47  
48  
49 77. Annest JL, Fingerhut LA, Gallagher SS, et al. Strategies to improve external cause-of-injury  
50 coding in state-based hospital discharge and emergency department data systems:  
51  
52  
53  
54  
55  
56  
57  
58  
59  
60

- 1  
2  
3 recommendations of the CDC Workgroup for Improvement of External Cause-of-Injury  
4 Coding. *MMWR Recomm Rep* 2008;57:1-15.  
5  
6  
7  
8 78. Coben JH, Steiner CA, Barrett M, Merrill CT, Adamson D. Completeness of cause of injury  
9 coding in healthcare administrative databases in the United States, 2001. *Inj Prev*  
10 2006;12:199-201.  
11  
12  
13  
14 79. Spivey MI, Schnitzer PG, Kruse RL, Slusher P, Jaffe DM. Association of injury visits in  
15 children and child maltreatment reports. *J Emerg Med* 2009;36:207-14.  
16  
17  
18  
19 80. LaCalle E, Rabin E. Frequent users of emergency departments: the myths, the data, and the  
20 policy implications. *Ann Emerg Med* 2010;56:42-8.  
21  
22  
23  
24 81. Locker TE, Baston S, Mason SM, Nicholl J. Defining frequent use of an urban emergency  
25 department. *Emerg Med J* 2007;24:398-401.  
26  
27  
28  
29 82. Davis JW, Fujimoto RY, Chan H, Juarez DT. Identifying characteristics of patients with low  
30 urgency emergency department visits in a managed care setting. *Manag Care* 2010;19:38-  
31 44.  
32  
33  
34  
35 83. Uscher-Pines L, Pines J, Kellermann A, Gillen E, Mehrotra A. Emergency department visits  
36 for nonurgent conditions: systematic literature review. *Am J Manag Care* 2013;19:47-59.  
37  
38  
39  
40 84. Bayliss EA, Ellis JL, Shoup JA, Zeng C, McQuillan DB, Steiner JF. Effect of continuity of  
41 care on hospital utilization for seniors with multiple medical conditions in an integrated  
42 health care system. *Ann Fam Med* 2015;13:123-9.  
43  
44  
45  
46  
47 85. Liss DT, Chubak J, Anderson ML, Saunders KW, Tuzzio L, Reid RJ. Patient-reported care  
48 coordination: associations with primary care continuity and specialty care use. *Ann Fam*  
49 *Med* 2011;9:323-9.  
50  
51  
52  
53  
54  
55  
56  
57  
58  
59  
60



- 1  
2  
3 86. Hess LM, Raebel MA, Conner DA, Malone DC. Measurement of adherence in pharmacy  
4 administrative databases: a proposal for standard definitions and preferred measures. *Ann*  
5  
6 *Pharmacother* 2006;40:1280-88.  
7  
8  
9  
10 87. Karve S, Cleves MA, Helm M, Hudson TJ, West DS, Martin BC. Good and poor adherence:  
11 optimal cut-point for adherence measures using administrative claims data. *Curr Med Res*  
12  
13 *Opin* 2009;25:2303-10.  
14  
15  
16  
17 88. Colantonio LD, Huang L, Monda KL, et al. Adherence to High-Intensity Statins Following  
18 a Myocardial Infarction Hospitalization Among Medicare Beneficiaries. *JAMA Cardiol*  
19  
20 2017;2:890-5.  
21  
22  
23  
24 89. Ostbye T, Taylor DH, Jr., Clipp EC, Scoyoc LV, Plassman BL. Identification of dementia:  
25 agreement among national survey data, medicare claims, and death certificates. *Health Serv*  
26  
27 *Res* 2008;43:313-26.  
28  
29  
30  
31 90. Taylor DH, Jr., Fillenbaum GG, Ezell ME. The accuracy of medicare claims data in  
32 identifying Alzheimer's disease. *J Clin Epidemiol* 2002;55:929-37.  
33  
34  
35  
36 91. Faurot KR, Jonsson Funk M, Pate V, et al. Using claims data to predict dependency in  
37 activities of daily living as a proxy for frailty. *Pharmacoepidemiol Drug Saf* 2015;24:59-66.  
38  
39  
40 92. Zhang HT, McGrath LJ, Wyss R, Ellis AR, Sturmer T. Controlling confounding by frailty  
41 when estimating influenza vaccine effectiveness using predictors of dependency in activities  
42 of daily living. *Pharmacoepidemiol Drug Saf* 2017.  
43  
44  
45  
46 93. Rosen T, Bloemen EM, LoFaso VM, Clark S, Flomenbaum NE, Lachs MS. Emergency  
47 Department presentations for injuries in older adults independently known to be victims of  
48 elder abuse. *J Emerg Med* 2016;50:518-26.  
49  
50  
51  
52  
53  
54  
55  
56  
57  
58  
59  
60

- 1  
2  
3 94. Rosen T, LoFaso V, Bloemen EM, et al. Injury patterns in physical elder abuse: preliminary  
4 findings from a pilot sample of highly adjudicated cases. Society of Academic Emergency  
5 Medicine Annual Scientific Meeting. San Diego 2015.  
6  
7  
8  
9  
10 95. Jackson, S. Understanding elder abuse: new directions for developing theories of elder  
11 abuse occurring in domestic settings. 2013. (Accessed on February 10, 2020, at  
12 <https://www.ncjrs.gov/pdffiles1/nij/241731.pdf>)  
13  
14  
15  
16  
17 96. Wong NZ, Rosen T, Sanchez AM, et al. Imaging findings in elder abuse: a role for  
18 radiologists in detection. *Can Assoc Radiol J* 2017;68:16-20.  
19  
20  
21 97. Zhang Y, Padman R. Paving the COWPath: Learning and Visualizing Clinical Pathways  
22 from Electronic Health Record Data. Carnegie Mellon University; 2015.  
23  
24  
25  
26 98. Movahedi F, Carey L, Zhang Y, Padman R, Antaki J. Care pathway after Left Ventricular  
27 Assist Devices (LVAD) implementation. International Society for Heart and Lung  
28 Transplantation. San Diego, CA 2017.  
29  
30  
31  
32  
33 99. Ghosh S, Li J, Cao L, Ramamohanarao K. Septic shock prediction for ICU patients via  
34 coupled HMM walking on sequential contrast patterns. *J Biomed Inform* 2017;66:19-31.  
35  
36  
37  
38 100. Kawamoto R, Nazir A, Kameyama A, et al. Hidden Markov model for analyzing time-series  
39 health checkup data. *Stud Health Technol Inform* 2013;192:491-5.  
40  
41  
42  
43 101. Watkins RE, Eagleson S, Veenendaal B, Wright G, Plant AJ. Disease surveillance using a  
44 hidden Markov model. *BMC Med Inform Decis Mak* 2009;9:39.  
45  
46  
47 102. Zhang Y, Padman R. Innovations in chronic care delivery using data-driven clinical  
48 pathways. *Am J Manag Care* 2015;21:e661-8.  
49  
50  
51  
52  
53  
54  
55  
56  
57  
58  
59  
60

- 1  
2  
3 103. Duncan DF, Kum HC, Weigensberg EC, Flair KA, Stewart CJ. Informing child welfare  
4 policy and practice: Using knowledge discovery and data mining technology via a dynamic  
5 web site. *Child Maltreat* 2008;13:383-91.  
6  
7  
8  
9  
10 104. Hye-Chung (Monica) Kum JP, Wei Wang, Dean Duncan. ApproxMAP: Approximate  
11 Mining of Consensus Sequential Patterns. (Accessed on February 10, 2020 at  
12 <http://citeseerx.ist.psu.edu/viewdoc/download?doi=10.1.1.12.2633&rep=rep1&type=pdf>)  
13  
14  
15  
16  
17 105. Zaki MJ. SPADE: An Efficient Algorithm for Mining Frequent Sequences. *Machine*  
18 *Learning* 2001;42:31-60.  
19  
20  
21 106. Rabiner L. A tutorial on hidden Markov models and selected applications in speech  
22 recognition. *IEEE* 1989. (Accessed on February 10, 2020 at  
23 [http://www.ece.ucsb.edu/Faculty/Rabiner/ece259/Reprints/tutorial%20on%20hmm%20and](http://www.ece.ucsb.edu/Faculty/Rabiner/ece259/Reprints/tutorial%20on%20hmm%20and%20applications.pdf)  
24 [%20and](http://www.ece.ucsb.edu/Faculty/Rabiner/ece259/Reprints/tutorial%20on%20hmm%20and%20applications.pdf)  
25 [%20applications.pdf](http://www.ece.ucsb.edu/Faculty/Rabiner/ece259/Reprints/tutorial%20on%20hmm%20and%20applications.pdf))  
26  
27  
28  
29  
30  
31  
32  
33  
34  
35  
36  
37  
38  
39  
40  
41  
42  
43  
44  
45  
46  
47  
48  
49  
50  
51  
52  
53  
54  
55  
56  
57  
58  
59  
60

1  
2  
3 **Authors' contributions:** TR, YB, YZ, SC, AE, KP, MSL conceived of the study. All authors are  
4 contributed to the design of the study protocol. TR wrote the manuscript first draft. All authors  
5 contributed to and approved the final manuscript.  
6  
7  
8  
9

10  
11  
12 **Funding statement:** This work was supported by a grant from the National Institute on Aging  
13 (R01 AG060086). Tony Rosen's participation has also been supported by a Paul B. Beeson  
14 Emerging Leaders Career Development Award in Aging (K76 AG054866) from the National  
15 Institute on Aging. The funder has not been involved in the design or conduct of the research.  
16  
17  
18  
19  
20  
21  
22  
23

24 **Competing interests statement:** Authors have no competing interests to report.  
25  
26  
27

28 **Acknowledgements:** We deeply appreciate the continued partnership of our colleagues /  
29 partners at the King's Count District Attorney's Office in Brooklyn, NY and the King County  
30 Prosecuting Attorney's Office in Seattle, WA without whom this work wouldn't be possible.  
31  
32  
33  
34  
35  
36  
37  
38  
39  
40  
41  
42  
43  
44  
45  
46  
47  
48  
49  
50  
51  
52  
53  
54  
55  
56  
57  
58  
59  
60

Figure 1: Conceptual Framework for Health Care Utilization by Elder Abuse Victims

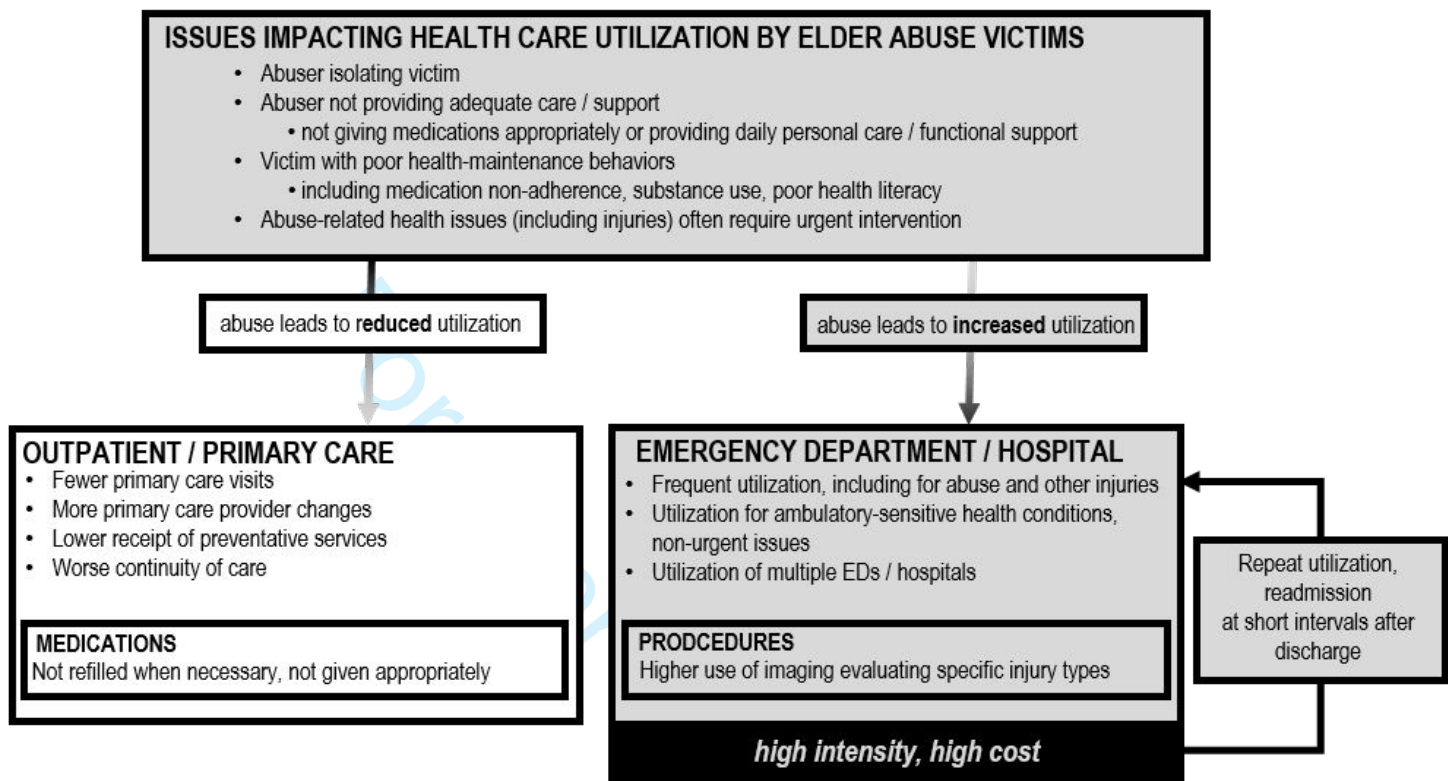

**Table 1: Selected Key Measures of Health Care Utilization**

| Site / Type          | Utilization Measure                                                                                                                                                                                                                                                                                                                                                                                                                 |
|----------------------|-------------------------------------------------------------------------------------------------------------------------------------------------------------------------------------------------------------------------------------------------------------------------------------------------------------------------------------------------------------------------------------------------------------------------------------|
| Emergency Department | <ul style="list-style-type: none"> <li>• Injury-related visits</li> <li>• Total visits, including identification of high-frequency users</li> <li>• Low urgency visits, visits for ambulatory care sensitive conditions</li> <li>• Repeat visits to the ED within 3 days, 7 days, 30 days of initial visit</li> <li>• Visits to multiple EDs</li> </ul>                                                                             |
| Hospital             | <ul style="list-style-type: none"> <li>• Injury-related hospitalizations</li> <li>• Total hospitalizations</li> <li>• Visits for ambulatory care sensitive conditions</li> <li>• Repeat hospitalizations within 30 days, 90 days of initial hospitalization</li> <li>• Visits to multiple hospitals</li> </ul>                                                                                                                      |
| Outpatient           | <ul style="list-style-type: none"> <li>• Injury-related visits to primary care provider</li> <li>• Total visits to primary care provider</li> <li>• Receipt of preventative services</li> <li>• Periods with no primary care provider selected</li> <li>• Changes to primary care provider</li> <li>• Continuity of care (via Continuity of Care Index)</li> <li>• Medication adherence (via Proportion of Days Covered)</li> </ul> |

# BMJ Open

## Identifying Patterns of Health Care Utilization among Physical Elder Abuse Victims Using Medicare Data and Legally Adjudicated Cases: Protocol for Case-Control Study using Data Linkage and Machine Learning

|                                 |                                                                                                                                                                                                                                                                                                                                                                                                                                                                                                                                                                                                                                                                                                                                                                                                                                                                                                                                                                                                                                                                                                                                                                                                                                                                                                                                                                                                                                                    |
|---------------------------------|----------------------------------------------------------------------------------------------------------------------------------------------------------------------------------------------------------------------------------------------------------------------------------------------------------------------------------------------------------------------------------------------------------------------------------------------------------------------------------------------------------------------------------------------------------------------------------------------------------------------------------------------------------------------------------------------------------------------------------------------------------------------------------------------------------------------------------------------------------------------------------------------------------------------------------------------------------------------------------------------------------------------------------------------------------------------------------------------------------------------------------------------------------------------------------------------------------------------------------------------------------------------------------------------------------------------------------------------------------------------------------------------------------------------------------------------------|
| Journal:                        | <i>BMJ Open</i>                                                                                                                                                                                                                                                                                                                                                                                                                                                                                                                                                                                                                                                                                                                                                                                                                                                                                                                                                                                                                                                                                                                                                                                                                                                                                                                                                                                                                                    |
| Manuscript ID                   | bmjopen-2020-044768.R1                                                                                                                                                                                                                                                                                                                                                                                                                                                                                                                                                                                                                                                                                                                                                                                                                                                                                                                                                                                                                                                                                                                                                                                                                                                                                                                                                                                                                             |
| Article Type:                   | Protocol                                                                                                                                                                                                                                                                                                                                                                                                                                                                                                                                                                                                                                                                                                                                                                                                                                                                                                                                                                                                                                                                                                                                                                                                                                                                                                                                                                                                                                           |
| Date Submitted by the Author:   | 13-Nov-2020                                                                                                                                                                                                                                                                                                                                                                                                                                                                                                                                                                                                                                                                                                                                                                                                                                                                                                                                                                                                                                                                                                                                                                                                                                                                                                                                                                                                                                        |
| Complete List of Authors:       | Rosen, Tony; Weill Cornell Medicine / NewYork-Presbyterian Hospital, Department of Emergency Medicine<br>Bao, Yuhua; Weill Cornell Medical College, Department of Health Policy & Research<br>Zhang, Yiye; Weill Cornell Medical College, Department of Health Policy & Research<br>Clark, Sunday; Weill Cornell Medicine / NewYork-Presbyterian Hospital, Department of Emergency Medicine<br>Wen, Katherine; Cornell University, Department of Policy Analysis and Management<br>Elman, Alyssa; Weill Cornell Medicine / NewYork-Presbyterian Hospital, Department of Emergency Medicine<br>Jeng, Philip; Weill Cornell Medical College, Department of Health Policy & Research<br>Bloemen, Elizabeth; University of Colorado School of Medicine, Department of Internal Medicine<br>Lindberg, Daniel; University of Colorado School of Medicine, The Kempe Center for the Prevention & Treatment of Child Abuse & Neglect<br>Krugman, Richard; University of Colorado School of Medicine, The Kempe Center for the Prevention & Treatment of Child Abuse & Neglect<br>Campbell, Jacquelyn ; John Hopkins University<br>Bachman, Ronet; University of Delaware, Department of Criminology<br>Fulmer, Terry; John A Hartford Foundation<br>Pillemer, Karl ; Cornell University, Department of Policy Analysis and Management<br>Lachs, Mark ; Weill Cornell Medicine / NewYork-Presbyterian Hospital, Division of Geriatrics and Palliative Care, |
| <b>Primary Subject Heading</b>: | Geriatric medicine                                                                                                                                                                                                                                                                                                                                                                                                                                                                                                                                                                                                                                                                                                                                                                                                                                                                                                                                                                                                                                                                                                                                                                                                                                                                                                                                                                                                                                 |
| Secondary Subject Heading:      | Health services research                                                                                                                                                                                                                                                                                                                                                                                                                                                                                                                                                                                                                                                                                                                                                                                                                                                                                                                                                                                                                                                                                                                                                                                                                                                                                                                                                                                                                           |
| Keywords:                       | GERIATRIC MEDICINE, HEALTH ECONOMICS, Protocols & guidelines < HEALTH SERVICES ADMINISTRATION & MANAGEMENT                                                                                                                                                                                                                                                                                                                                                                                                                                                                                                                                                                                                                                                                                                                                                                                                                                                                                                                                                                                                                                                                                                                                                                                                                                                                                                                                         |
|                                 |                                                                                                                                                                                                                                                                                                                                                                                                                                                                                                                                                                                                                                                                                                                                                                                                                                                                                                                                                                                                                                                                                                                                                                                                                                                                                                                                                                                                                                                    |

1  
2  
3  
4  
5  
6  
7  
8  
9  
10  
11  
12  
13  
14  
15  
16  
17  
18  
19  
20  
21  
22  
23  
24  
25  
26  
27  
28  
29  
30  
31  
32  
33  
34  
35  
36  
37  
38  
39  
40  
41  
42  
43  
44  
45  
46  
47  
48  
49  
50  
51  
52  
53  
54  
55  
56  
57  
58  
59  
60

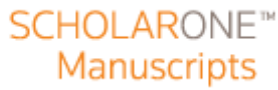





I, the Submitting Author has the right to grant and does grant on behalf of all authors of the Work (as defined in the below author licence), an exclusive licence and/or a non-exclusive licence for contributions from authors who are: i) UK Crown employees; ii) where BMJ has agreed a CC-BY licence shall apply, and/or iii) in accordance with the terms applicable for US Federal Government officers or employees acting as part of their official duties; on a worldwide, perpetual, irrevocable, royalty-free basis to BMJ Publishing Group Ltd ("BMJ") its licensees and where the relevant Journal is co-owned by BMJ to the co-owners of the Journal, to publish the Work in this journal and any other BMJ products and to exploit all rights, as set out in our [licence](#).

The Submitting Author accepts and understands that any supply made under these terms is made by BMJ to the Submitting Author unless you are acting as an employee on behalf of your employer or a postgraduate student of an affiliated institution which is paying any applicable article publishing charge ("APC") for Open Access articles. Where the Submitting Author wishes to make the Work available on an Open Access basis (and intends to pay the relevant APC), the terms of reuse of such Open Access shall be governed by a Creative Commons licence – details of these licences and which [Creative Commons](#) licence will apply to this Work are set out in our licence referred to above.

Other than as permitted in any relevant BMJ Author's Self Archiving Policies, I confirm this Work has not been accepted for publication elsewhere, is not being considered for publication elsewhere and does not duplicate material already published. I confirm all authors consent to publication of this Work and authorise the granting of this licence.

1  
2  
3  
4  
5  
6  
7  
8  
9  
10  
11  
12  
13  
14  
15  
16  
17  
18  
19  
20  
21  
22  
23  
24 **Identifying Patterns of Health Care Utilization among Physical Elder Abuse Victims Using**  
25 **Medicare Data and Legally Adjudicated Cases: Protocol for Case-Control Study using**  
26 **Data Linkage and Machine Learning**  
27  
28  
29  
30  
31

32 Tony Rosen MD MPH<sup>1</sup>, Yuhua Bao PhD<sup>2</sup>, Yiye Zhang PhD<sup>2</sup>, Sunday Clark ScD MPH<sup>1</sup>,  
33 Katherine Wen, MPP<sup>3</sup>, Alyssa Elman, LMSW<sup>1</sup>, Philip J. Jeng, MS<sup>2</sup>, Elizabeth Bloemen, MD,  
34 MPH<sup>4</sup>, Daniel Lindberg MD<sup>5</sup>, Richard Krugman MD<sup>5</sup>, Jacquelyn Campbell PhD<sup>6</sup>, Ronet  
35 Bachman PhD<sup>7</sup>, Terry Fulmer PhD<sup>8</sup>, Karl Pillemer PhD<sup>3</sup>, Mark S. Lachs MD<sup>9</sup>  
36  
37  
38

39 <sup>1</sup>Department of Emergency Medicine, Weill Cornell Medicine / NewYork-Presbyterian Hospital

40 <sup>2</sup>Department of Health Policy & Research, Weill Cornell Medical College

41 <sup>3</sup>Department of Policy Analysis and Management, Cornell University

42 <sup>4</sup>Department of Internal Medicine, University of Colorado School of Medicine

43 <sup>5</sup>The Kempe Center for the Prevention & Treatment of Child Abuse & Neglect, University of  
44 Colorado School of Medicine

45 <sup>6</sup>Johns Hopkins University School of Nursing

46 <sup>7</sup>Department of Criminology, University of Delaware

47 <sup>8</sup>John A. Hartford Foundation

48 <sup>9</sup>Division of Geriatrics and Palliative Care, Weill Cornell Medical College / NewYork-  
49 Presbyterian Hospital  
50  
51  
52  
53

54 Corresponding Author: Tony Rosen, MD MPH, 525 East 68<sup>th</sup> Street, Room 130, 212-746-0780,  
55 aer2006@med.cornell.edu  
56  
57  
58  
59  
60

## Abstract

**Introduction:** Physical elder abuse is common and has serious health consequences but is under-recognized and under-reported. As assessment by health care providers may represent the only contact outside family for many older adults, clinicians have a unique opportunity to identify suspected abuse and initiate intervention. Preliminary research suggests elder abuse victims may have different patterns of health care utilization than other older adults, with increased rates of Emergency Department use, hospitalization, and nursing home placement. Little is known, however, about the patterns of this increased utilization and associated costs. To help fill this gap, we describe here the protocol for a study exploring patterns of health care utilization and associated costs for known physical elder abuse victims compared to non-victims.

**Methods and Analysis:** We hypothesize that various aspects of health care utilization are differentially affected by physical elder abuse victimization, increasing ED/hospital utilization and reducing outpatient/primary care utilization. We will obtain Medicare claims data for a series of well-characterized, legally adjudicated cases of physical elder abuse to examine victims' health care utilization before and after the date of abuse detection. We will also compare these physical elder abuse victims to a matched comparison group of non-victimized older adults using Medicare claims. We will use machine learning approaches to extend our ability to identify patterns suggestive of potential physical elder abuse exposure. Describing unique patterns and associated costs of health care utilization among elder abuse victims may improve the ability of health care providers to identify and, ultimately, intervene and prevent victimization.

**Ethics and Dissemination:** This project has been reviewed and approved by the Weill Cornell Medicine Institutional Review Board, protocol #1807019417, with initial approval on August 1,

1  
2  
3  
4  
5  
6  
7  
8  
9  
10  
11  
12  
13  
14  
15  
16  
17  
18  
19  
20  
21  
22  
23  
24  
25  
26  
27  
28  
29  
30  
31  
32  
33  
34  
35  
36  
37  
38  
39  
40  
41  
42  
43  
44  
45  
46  
47  
48  
49  
50  
51  
52  
53  
54  
55  
56  
57  
58  
59  
60

2018. We aim to disseminate our results in peer-reviewed journals, at national and international conferences and among interested patient groups and the public.

**Keywords:** elder abuse; elder mistreatment; health care utilization; machine learning; research protocol

For peer review only

### Article Summary: Strengths and limitations of this study:

- We explore patterns of health care utilization and associated costs for known physical elder abuse victims, about common and serious phenomenon about which little is known
- We use Medicare claims data for a series of well-characterized, legally adjudicated cases of physical elder abuse to comprehensively examine victims' health care utilization before and after the date of abuse detection in comparison to non-victimized older adults algorithmically selected from Medicare claims
- We use machine learning approaches to better identify patterns suggestive of potential physical elder abuse exposure
- Though using legally adjudicated cases solves the important methodologic challenge of ensuring that case subjects are actually victims of abuse, these cases represent a small percentage of all elder abuse cases and their experience of abuse may differ in important ways from other victims
- Subjects must have been enrolled in Medicare Fee-for-Service rather than Medicare Advantage or another insurance for us to be able to examine their health care utilization

## Introduction

Elder abuse is common and has serious health consequences but is under-recognized and under-reported. As many as 10% of US older adults experience elder abuse each year.<sup>1-6</sup> This maltreatment may include physical abuse, sexual abuse, neglect, psychological abuse, or financial exploitation, and many victims suffer from multiple types of abuse concurrently.<sup>1-5</sup> Evidence suggests that elder abuse is associated with adverse health outcomes, including disability,<sup>7</sup> dementia,<sup>8</sup> depression,<sup>8</sup> and mortality.<sup>9-11</sup> Despite its frequency, many elder abuse victims endure it for years before having it discovered or dying. Studies suggest that as few as 1 in 24 cases of elder abuse is reported to the authorities,<sup>1,3,12</sup> and some of the associated morbidity and mortality is likely due to this delay in identification and intervention.<sup>13</sup>

As assessment by health care providers may represent the only outside contact for many older adults, so clinicians have a unique opportunity to identify suspected elder abuse and initiate intervention.<sup>14-20</sup> Elder abuse victims have increased rates of emergency department (ED) use,<sup>14,17</sup> hospitalization,<sup>21</sup> and nursing home placement.<sup>22,23</sup> Little is known, however, about the patterns of this increased utilization and associated costs.<sup>5,24</sup> Influential research in child abuse<sup>25-30</sup> and intimate partner violence<sup>31,32</sup> has focused on health care utilization before identification, highlighting that many victims had multiple previous visits for likely abuse-related issues, suggesting “missed opportunities” for identification and early intervention. Child abuse researchers have found that minor abusive injuries, “sentinel injuries,” are commonly found in children who are subsequently victims of severe child abuse but rare in those who aren’t.<sup>33,34</sup> Strategies are being developed to capitalize on these findings to prevent morbidity and mortality for victims. Additionally, research has found that health care costs were significantly higher for victims of child abuse and intimate partner violence both in the short-term<sup>35,36</sup> and long-term,<sup>35,37-40</sup> compared to costs incurred by non-victims. These increased costs represent a key

1  
2  
3 component of the overall economic burden of these phenomena,<sup>41-44</sup> and related research  
4  
5 findings have been critical in revealing the scope and impact of child abuse and intimate partner  
6  
7 violence and in driving policymaking decisions. We know of no analogous research in elder  
8  
9 abuse.  
10

11  
12 To help fill this gap in the literature, we describe here the protocol for a study designed to  
13  
14 explore in detail patterns of health care utilization and associated costs for known physical elder  
15  
16 abuse victims compared to non-victims using analytic techniques including machine learning.  
17  
18  
19  
20  
21  
22  
23  
24  
25  
26  
27  
28  
29  
30  
31  
32  
33  
34  
35  
36  
37  
38  
39  
40  
41  
42  
43  
44  
45  
46  
47  
48  
49  
50  
51  
52  
53  
54  
55  
56  
57  
58  
59  
60

## Methods and Analysis

### *Conceptual Framework and Hypotheses*

We hypothesize that various aspects of health care utilization are differentially affected by physical elder abuse victimization. Many issues related to physical elder abuse potentially increase ED/hospital utilization and reduce outpatient/primary care utilization. We have developed a conceptual framework (Figure 1) to explain this pattern. This framework is informed by a model for elder abuse research that members of our team developed as part of the National Institute on Aging (NIA) Workshop “Multiple Approaches to Understanding and Preventing Elder Abuse and Mistreatment: Prevention and Intervention.”<sup>45</sup>

As shown in Figure 1, we further hypothesize that physical elder abuse victims, due to their poor connection to primary care, will have increased utilization of EDs/hospitals for ambulatory care-sensitive conditions (ACSCs) and for non-urgent issues. ACSCs are conditions that, if treated in a timely fashion with adequate primary care and managed properly on an outpatient basis, should not advance to the point where an ED visit or hospitalization is required.<sup>46</sup> Measuring the rate of use of high intensity, high cost services to treat these conditions is common in health services research to assess access to and quality of primary care.<sup>46-49</sup> Similarly, use of the ED for non-urgent issues suggests inappropriate use in the absence of primary care.

We also hypothesize that physical elder abuse victims will have high rates of repeat ED visits and re-hospitalizations within short intervals. This results from poor connections to primary care and poor adherence to outpatient follow-up care recommendations.<sup>50-53</sup> We anticipate that physical elder abuse victims will also have higher use of the ED/hospital for issues directly related to abuse, including presentation for injuries and use of imaging to evaluate



1  
2  
3 specific injury types. Based on anecdotal experiences by elder abuse experts,<sup>54</sup> we also  
4  
5 hypothesize that, compared to other older adults, physical elder abuse victims will more likely be  
6  
7 seen at multiple EDs and hospitals. This “hospital hopping” often occurs to avoid abuse  
8  
9 detection.<sup>55</sup>  
10  
11

12 Conversely, we hypothesize that poor access to and less frequent use of primary care will  
13  
14 be associated with more primary care provider changes, lower receipt of preventative services,  
15  
16 and worse continuity of care. More frequent changes in primary care providers result in fractured  
17  
18 care and have been shown in previous claims-based research to be associated with child abuse.<sup>56</sup>  
19  
20 Receipt of preventative services has been used in previous studies to assess level of primary care  
21  
22 utilization among Medicare beneficiaries and has been shown to be lower in older adults with  
23  
24 low primary care access including excess alcohol use and poor health literacy.<sup>57-61</sup> We anticipate  
25  
26 that physical elder abuse victims will have lower continuity of care, which has been shown in  
27  
28 Medicare beneficiaries to be associated with increased rates of frequent ED use.<sup>62</sup> Continuity of  
29  
30 care assesses the dispersion of outpatient evaluation and management visits, examining how  
31  
32 many unique doctors a patient visits within a specific timeframe.<sup>63</sup>  
33  
34  
35  
36

37 And finally, we also hypothesize that victims of physical elder abuse, partially due to  
38  
39 poor connection to primary care, will have poorer adherence to medications for chronic  
40  
41 conditions, such as diabetes medications and anti-hypertensives, which has been shown to impact  
42  
43 high intensity healthcare utilization and cost.<sup>64,65</sup>  
44  
45  
46  
47  
48

### 49 *Study Design*

50  
51 In this retrospective study, we will obtain Medicare claims data for a series of legally  
52  
53 adjudicated cases of physical elder abuse to comprehensively examine victims’ health care  
54  
55  
56  
57  
58  
59  
60

1  
2  
3 utilization before and after the date of abuse detection. We will also compare physical elder  
4  
5 abuse victims to other non-victimized older adults. We will algorithmically select this  
6  
7 comparison group from Medicare claims data to be matched to the physical elder abuse victims.  
8  
9

10 We will compare victims' ED/hospital and outpatient primary care utilization to that of  
11  
12 the control groups. We will use machine learning approaches to extend our ability to identify  
13  
14 patterns suggestive of potential physical elder abuse exposure.  
15  
16

17 This project has been reviewed and approved by the Weill Cornell Medicine Institutional  
18  
19 Review Board, protocol #1807019417 (initially approved on August 1, 2018). The Institutional  
20  
21 Review Board approved waiving the requirement to obtain informed consent from subjects in  
22  
23 this retrospective study.  
24  
25  
26  
27

### 28 *Study Subjects*

29  
30 For this research, we plan to use a well-characterized series of 204 legally adjudicated  
31  
32 cases of physical elder abuse from Brooklyn, New York and Seattle, Washington. The  
33  
34 methodologic advantage of this series of cases is unique: because the perpetrators have pled  
35  
36 guilty or been convicted, the presence of elder abuse has been verified and the time of detection  
37  
38 is known. This dataset includes rich information about the abuse victims and perpetrators as well  
39  
40 as details about the abuse history, when and how it was detected, and the surrounding  
41  
42 circumstances. It was constructed using information from the legal case files, including: medical  
43  
44 records, descriptions of Emergency Medical Services personnel and police interactions with the  
45  
46 victim and perpetrator, victim statements, adult protective services files, court documents, and  
47  
48 photographs of injuries.  
49  
50  
51  
52  
53  
54  
55  
56  
57  
58  
59  
60

### *Medicare Data Linkage*

We will link these legally adjudicated cases to Medicare claims data using identifying information including social security numbers and/or a combination of last name, date of birth and residential ZIP code. Fee-for-service Medicare data is the largest single repository of patient health care data for US older adults,<sup>66</sup> offering comprehensive information on utilization of a broad range of health care services for continuously enrolled individuals. Medicare claims data has been used successfully to analyze health care utilization and costs and to inform interventions and policies for a variety of chronic diseases.<sup>67-70</sup> Additionally, claims data have been used to examine the impact on utilization and cost of socio-medical issues<sup>71,72</sup> including excessive alcohol use.<sup>47,57,73</sup> Medicare claims data have also been employed to provide insight into the characteristics of frequent utilizers of specific health services, such as the ED<sup>62,74</sup> and hospital.<sup>75</sup>

We plan to examine Medicare claims data for each case from 3 years before to 3 years after detection of elder abuse and will compare to controls. We will use files including the Master Beneficiary Summary File (enrollee demographics, monthly enrollment information, chronic conditions, annual summary of costs and service utilization), Medicare Provider Analysis and Review (MEDPAR) file (events of inpatient hospital and skilled nursing facility stays), Outpatient Claims, Carrier File (claims of physician services), Home Health Claims, and the Part D (prescription drug) Event File.<sup>76</sup>

### *Measures*

We describe the key measures of utilization we plan to use in Table 1. We intend to focus primarily on utilization of high-intensity, high cost health care services including ED visits and hospitalizations by elder abuse victims and non-victim control subjects. We will examine overall

1  
2  
3 utilization of these services and will also look at several characteristics of this utilization. We  
4  
5 will examine the frequency of ED use and hospitalization among victims and compare utilization  
6  
7 of these services of victims and non-victim controls. We will focus on injury-related utilization,  
8  
9 using ICD codes and external cause of injury codes<sup>77,78</sup> similar to previous work in child  
10  
11 abuse.<sup>56,79</sup> We will also examine frequent ED use, defined as 4 or more visits in a year, the cut-  
12  
13 off accepted in the literature and used in previous Medicare research.<sup>62,74,80,81</sup> We plan to  
14  
15 measure the number of potentially avoidable low-urgency ED visits<sup>82,83</sup> as well as ED visits and  
16  
17 hospitalizations for ambulatory care-sensitive conditions (ACSCs). We will define low urgency  
18  
19 visits similar to previous literature<sup>82,83</sup> using Medicare Current Procedural Terminology (CPT)  
20  
21 billing codes (99281, 99282) indicating low severity and no additional procedures billed. For this  
22  
23 research, we will use the 11 ACSCs established for use in Medicare data.<sup>46</sup> We will also examine  
24  
25 repeat ED visits and re-hospitalizations within short intervals. Consistent with previous research,  
26  
27 we will examine visits to the ED within 3 days, 7 days, and 30 days of initial visit<sup>50,52</sup> as well as  
28  
29 repeat hospitalizations within 30 days and 90 days of initial hospitalization.<sup>51</sup> Additionally, we  
30  
31 will explore use of multiple EDs and hospitals.  
32  
33  
34  
35  
36

37  
38 For outpatient care, we will examine the number of primary care visits and focus on  
39  
40 injury-related visits for victims and controls. We will also examine changes in primary care  
41  
42 providers. We plan to evaluate the continuity of care using the widely employed Continuity of  
43  
44 Care Index (COCI).<sup>63</sup> Given that the COCI requires multiple outpatient visits to be meaningfully  
45  
46 calculated, we will only examine this variable for subjects with three or more outpatient visits,  
47  
48 consistent with previous literature.<sup>62,84,85</sup> We will measure whether physical elder abuse victims  
49  
50 and control subjects received preventative services, including influenza vaccination, glaucoma  
51  
52 screening, pneumonia vaccination, and mammogram.<sup>57</sup> We plan to examine adherence to  
53  
54  
55  
56  
57  
58  
59  
60

1  
2  
3 medication for chronic conditions. To do this, we will measure the proportion of days  
4 covered<sup>86,87</sup> and determine adherent vs. non-adherent using 0.80 as a cut-off, a common research  
5  
6 strategy in administrative claims data.<sup>87,88</sup>  
7  
8  
9

10 We will examine demographic data, including age, gender, and race/ethnicity. We will  
11 also use claims data for key health-related co-variables to allow for further characterization of  
12 physical elder abuse victims and comparison of sub-groups. These include medical co-  
13 morbidities, psychiatric co-morbidities, dementia, and frailty. For medical co-morbidities, we  
14 plan to use chronic condition indicators within the Medicare Master Beneficiary file, and we will  
15 use psychiatric diagnoses within claims data. We will use an established approach<sup>35,89,90</sup> to  
16 identify dementia. To identify frailty, we will use a recently-developed algorithm designed for  
17 use in Medicare claims data.<sup>91,92</sup>  
18  
19  
20  
21  
22  
23  
24  
25  
26  
27  
28  
29  
30

### 31 *Non-Victim Control Subjects*

32  
33 We will select a group of non-victim control subjects matched to the cases on age, race,  
34 gender, and residential ZIP code at the time of detection of each elder abuse case. This control  
35 group will allow us to compare health care utilization of elder abuse victims with that of a  
36 general older adult population. We will construct a second control group who, in addition to  
37 being matched to the cases on age, race, gender, and ZIP code, visited the ED for an  
38 unintentional injury within one week of the victim's abuse detection by law enforcement. This  
39 second control group will allow us to explore potential differences between older adults  
40 presenting to the ED for abuse-related injuries and those presenting with unintentional injuries, a  
41 key focus of our previous research.<sup>93,94</sup> Findings from such comparisons may assist health care  
42 providers, particularly in the ED, to differentiate between physical elder abuse and unintentional  
43  
44  
45  
46  
47  
48  
49  
50  
51  
52  
53  
54  
55  
56  
57  
58  
59  
60

1  
2  
3 injuries, informing future development of clinical algorithms to assist in this identification.  
4  
5 Because we may have more controls than needed meeting the selection criteria within the first  
6  
7 control cohort outlined above, we will further conduct propensity score matching to select  
8  
9 controls that more closely match with the cases.  
10  
11

12 We recognize that older adults selected as control subjects may actually be victims of  
13  
14 physical elder abuse. To minimize the likelihood of this, we will ensure that all selected controls  
15  
16 have never received any elder maltreatment-related diagnosis within Medicare claims data.  
17  
18  
19  
20

### 21 *Focus on Physical Abuse*

22  
23  
24 Though physical elder abuse may occur less frequently than other types of mistreatment,  
25  
26 we think that focusing on these cases is a strength of our approach. Researchers have recognized  
27  
28 that elder mistreatment is not a monolithic phenomenon and that etiologies, victim and  
29  
30 perpetrator characteristics, risk factors, clinical features, and sequelae likely differ in important  
31  
32 ways between mistreatment types.<sup>95</sup> An important reason that previous research has yielded  
33  
34 inconsistent findings and little clinically useful information is likely that heterogeneous cases  
35  
36 were analyzed together. We have chosen to focus on physical abuse because this violent  
37  
38 mistreatment may be particularly dangerous for an older adult. Our research focuses on health  
39  
40 care utilization for abuse victims and the potential for improving early identification in health  
41  
42 care settings such as the emergency department. Given that physical abuse often causes acute  
43  
44 injury which may trigger health care visits more commonly than other types of elder  
45  
46 mistreatment, health care providers may have a particular opportunity to identify it. Linking  
47  
48 known elder abuse cases to Medicare claims data to describe rates and patterns of health care  
49  
50  
51  
52  
53  
54  
55  
56  
57  
58  
59  
60

1  
2  
3 utilization may also be used to examine victims of other types of elder mistreatment, though, and  
4  
5 we plan to explore this in the future.  
6  
7

### 8 9 10 *Analysis*

11  
12 We will conduct descriptive longitudinal analysis of health care utilization up to 3 years  
13  
14 before and 3 years after the detection of elder abuse (and among control cohorts). For each elder  
15  
16 abuse case, we will determine the calendar month in which the case was detected (the “index  
17  
18 month”). We will then group months before and after the index month into 3-month  
19  
20 intervals/quarters. Our unit of analysis will be patient-quarter. We will plot measured outcomes  
21  
22 over time (centered around the index month) and visualize level of utilization in time blocks in  
23  
24 relationship to the index month.  
25  
26

27  
28 We will compare utilization between physical elder abuse cases and non-victim control  
29  
30 subjects using the key measures described above, focusing on identifying important differences.  
31  
32 Comparisons will also specifically focus on rates of radiographic utilization of maxillofacial CT  
33  
34 scan and forearm x-rays as well as diagnoses including acute or chronic facial or chronic ulnar  
35  
36 fracture, and chronic rib fracture as they have been found to be potential predictors of physical  
37  
38 elder abuse.<sup>96</sup> We will compare total costs between cases and controls and then examine in detail  
39  
40 contributing costs associated with each type of utilization.  
41  
42

43  
44 We will also conduct statistical modelling of longitudinal healthcare utilization outcomes  
45  
46 to estimate adjusted differences between physical elder abuse victims and non-victims at various  
47  
48 time points before and after the index month. For example, for the dichotomous outcome of any  
49  
50 ED or inpatient admission in a quarter, we will estimate a mixed logistic regression where major  
51  
52 covariates include victim status, time (relative to index month), and interaction of victim status  
53  
54  
55  
56  
57  
58  
59

1  
2  
3 and time, controlling for individual demographics and comorbidities. Random effects will be  
4 specified at the patient level (to account for repeated measures of the same individual) and zip  
5 code (to account for clustering of patients within the same zip code) levels.  
6  
7

8  
9  
10 We have conducted power calculations with these cases and controls, incorporating  
11 assumptions about Medicare linking rate (50% of cases), number of quarters of data contributed  
12 by each individual (6 quarters), percentage of subjects with  $\geq 1$  ED visit in a quarter (12% of  
13 elder abuse victims and 6% of controls), and intra cluster correlation (0.2, to account for  
14 clustering of quarters within the same individual). Using these assumptions, we have a power of  
15 0.82, which is adequate to identify important differences in utilization between cases and  
16 controls.  
17  
18  
19  
20  
21  
22  
23  
24  
25  
26  
27

### 28 *Using Machine Learning*

29  
30 The comparative statistical analysis described above will illuminate the trajectories of  
31 health care use one type at a time. It lacks the ability to integrate multi-dimensional data that,  
32 combined, forms unique patterns of care. Recent innovations in machine learning make it  
33 possible to use vast amounts of data, such as service utilization, diagnoses received, and  
34 procedures performed, to identify sequences and mix of clinical events likely to lead to particular  
35 outcomes or suggestive of an underlying disease process for different cohorts of patients.<sup>97-102</sup>  
36  
37 For example, sequential pattern mining has been used in child abuse to examine patterns of  
38 services provided to victims.<sup>103,104</sup> To supplement the proposed statistical analysis, we propose to  
39 search for features within claims data that may be suggestive that an older adult is a victim of  
40 abuse. We will use Sequential PAttern Discovery using Equivalence classes (SPADE),<sup>105</sup> a well-  
41 established algorithm which identifies patterns that are observed more than a user-defined  
42  
43  
44  
45  
46  
47  
48  
49  
50  
51  
52  
53  
54  
55  
56  
57  
58  
59  
60



1  
2  
3 frequency threshold in a cohorts' sequences of event. In addition, we will use Markov  
4  
5 modeling<sup>106</sup> to identify the probabilities of observed patterns and associated underlying status of  
6  
7 abuse to better distinguish patterns that are unique to elderly abused patients. We may find, for  
8  
9 example, that a significant percentage of abuse victims have two ED visits and a hospitalization  
10  
11 within a 3-month period and receive forearm x-rays and are diagnosed with a fracture, but this  
12  
13 pattern is never seen in controls.  
14  
15

### 16 17 18 19 *Patient and public involvement*

20  
21 We plan to involve older adults including victims of elder mistreatment in the reporting  
22  
23 and dissemination for this this research.  
24  
25

### 26 27 28 29 *Timeline*

30 This research was initiated in 2018 and we plan to report results by 2023.  
31  
32

### 33 34 35 *Discussion*

36 This ongoing work will address a significant gap in current knowledge about elder abuse  
37  
38 by improving understanding of how physical abuse victims use health care services differently  
39  
40 than non-victims as well as associated costs. We anticipate insights from our findings will  
41  
42 generate hypotheses that may be tested in future studies in different populations and among  
43  
44 victims of different types of elder mistreatment. We also expect that this work will lead to  
45  
46 additional uses of claims data to explore the health consequences of elder abuse and to identify  
47  
48 utilization patterns with “red flags” suggestive of exposure. Ultimately, we anticipate that  
49  
50 knowledge gleaned will support the future development of a health informatics tool to identify  
51  
52 potential victims.  
53  
54  
55  
56  
57  
58  
59  
60

1  
2  
3 An important limitation of our approach is the use of legally adjudicated cases. Though  
4 using this source solves the important methodologic challenge of ensuring that case subjects are  
5 actually victims of abuse, legally adjudicated cases represent a small percentage of all cases, and  
6 abuse victims included may differ in important ways from other victims. They may have  
7 experienced more acute or severe abuse allowing identification, and subtle cases of abuse that  
8 are more challenging to detect may not have been included. Additionally, other circumstances  
9 surrounding the case including the availability of evidence, the willingness of the victim to  
10 participate, jurisdiction's practice pattern may have impacted the decision to prosecute the  
11 perpetrator, significantly reducing potential generalizability. An important challenge in previous  
12 studies has been accurately classifying subjects as victims of mistreatment. This has likely  
13 contributed to inconsistent research findings. Our new potential approach will generate  
14 trustworthy results that may identify patterns and generate hypotheses that may be tested. We  
15 anticipate that rigorous studies such as ours will lay the necessary groundwork for future studies  
16 focused on identifying and examining more subtle cases.  
17  
18  
19  
20  
21  
22  
23  
24  
25  
26  
27  
28  
29  
30  
31  
32  
33  
34

35 Also, our research strategy relies on linking to Medicare Fee-for-Service records. If  
36 subjects were covered by Medicare Advantage or otherwise not covered by Medicare Fee-For-  
37 Service for any period, information about their health care utilization would not be available  
38 during that period. We have incorporated this potential into our power calculation assumptions,  
39 however, and believe we will be able to identify important differences in utilization.  
40  
41  
42  
43  
44  
45  
46

47 Another important limitation is that selected control subjects may actually be unidentified  
48 cases, reducing the accuracy of our conclusions. Using elder mistreatment diagnoses within  
49 Medicare data is not an ideal method for ensuring controls are not cases, given that these  
50 diagnoses are infrequently and unreliably included. We hope to overcome this limitation by  
51  
52  
53  
54  
55  
56  
57  
58  
59  
60

1  
2  
3 selecting multiple control cohorts, each with large numbers of controls. Using this approach, and  
4  
5 performing sensitivity analyses on our findings, will allow us to identify patterns and draw  
6  
7 meaningful conclusions even if a small number of controls are actually abuse victims.  
8  
9

10 Although we believe that machine learning techniques have enormous potential to find  
11  
12 subtle patterns, it is possible that we will not identify any that are clinically identifiable or  
13  
14 meaningful. Despite these potential limitations, we believe this research offers a unique  
15  
16 opportunity to use a large series of well-characterized cases of physical elder abuse to help us  
17  
18 understand the health-related markers that can be used to more validly predict elder abuse, and  
19  
20 thereby prevent it.  
21  
22

23  
24 Improved understanding of patterns and associated costs of health care utilization among  
25  
26 elder abuse victims, which likely differs substantially from that of other older adults, is  
27  
28 potentially very valuable. It may improve the ability of health care providers to identify,  
29  
30 intervene, and prevent victimization. Further, it may inform policy changes to reduce costs and  
31  
32 help this vulnerable population. The research described here represents an important step in  
33  
34 exploring the potential of examining health care utilization to provide insight into elder abuse  
35  
36 and how to address it.  
37  
38  
39  
40  
41  
42  
43  
44  
45  
46  
47  
48  
49  
50  
51  
52  
53  
54  
55  
56  
57  
58  
59  
60

### **Ethics and Dissemination**

This project has been reviewed and approved by the Weill Cornell Medicine Institutional Review Board, protocol #1807019417, with initial approval on August 1, 2018. We aim to disseminate our results in peer-reviewed journals, at national and international conferences and among interested patient groups and the public.

For peer review only

## References

1. Acierno R, Hernandez MA, Amstadter AB, et al. Prevalence and correlates of emotional, physical, sexual, and financial abuse and potential neglect in the United States: the National Elder Mistreatment Study. *Am J Public Health* 2010;100:292-7.
2. Lachs MS, Pillemer K. Elder abuse. *Lancet* 2004;364:1263-72.
3. Under the Radar: New York State Elder Abuse Prevalence Study: Self-Reported Prevalence and Documented Case Surveys 2012. (Accessed February 10, 2020, at <https://ocfs.ny.gov/main/reports/Under%20the%20Radar%2005%2012%2011%20final%20report.pdf>)
4. National Research Council. Elder mistreatment: Abuse, neglect and exploitation in an aging America. Washington, DC: The National Academies Press; 2003.
5. National Center for Elder Abuse. The Elder Justice Roadmap: A Stakeholder Initiative to Respond to an Emerging Health, Justice, Financial, and Social Crisis. (Accessed February 10, 2020, at <https://www.justice.gov/file/852856/download>)
6. Lachs MS, Pillemer KA. Elder abuse. *N Engl J Med* 2015;373:1947-56.
7. Schofield MJ, Powers JR, Loxton D. Mortality and disability outcomes of self-reported elder abuse: a 12-year prospective investigation. *J Am Geriatr Soc* 2013;61:679-85.
8. Dyer CB, Pavlik VN, Murphy KP, Hyman DJ. The high prevalence of depression and dementia in elder abuse or neglect. *J Am Geriatr Soc* 2000;48:205-8.
9. Lachs MS, Williams CS, O'Brien S, Pillemer KA, Charlson ME. The mortality of elder mistreatment. *JAMA* 1998;280:428-32.
10. Dong XQ, Simon MA, Beck TT, et al. Elder abuse and mortality: the role of psychological and social wellbeing. *Gerontology* 2011;57:549-58.

- 1  
2  
3 11. Baker MW, LaCroix AZ, Wu C, Cochrane BB, Wallace R, Woods NF. Mortality risk  
4 associated with physical and verbal abuse in women aged 50 to 79. *J Am Geriatr Soc*  
5  
6 2009;57:1799-809.  
7
- 8  
9  
10 12. Pillemer K, Finkelhor D. The prevalence of elder abuse: a random sample survey.  
11  
12 *Gerontologist* 1988;28:51-7.  
13
- 14 13. Murphy K, Waa S, Jaffer H, Sauter A, Chan A. A literature review of findings in physical  
15  
16 elder abuse. *Can Assoc Radiol J* 2013;64:10-4.  
17
- 18 14. Lachs MS, Williams CS, O'Brien S, et al. ED use by older victims of family violence. *Ann*  
19  
20 *Emerg Med* 1997;30:448-54.  
21
- 22 15. Bond MC, Butler KH. Elder abuse and neglect: definitions, epidemiology, and approaches  
23  
24 to emergency department screening. *Clin Geriatr Med* 2013;29:257-73.  
25
- 26 16. Geroff AJ, Olshaker JS. Elder abuse. *Emerg Med Clin North Am* 2006;24:491-505.  
27
- 28 17. Dong X, Simon MA. Association between elder abuse and use of ED: findings from the  
29  
30 Chicago Health and Aging Project. *Am J Emerg Med* 2013;31:693-8.  
31
- 32 18. Friedman LS, Avila S, Tanouye K, Joseph K. A case-control study of severe physical abuse  
33  
34 of older adults. *J Am Geriatr Soc* 2011;59:417-22.  
35
- 36 19. Heyborne RD. Elder abuse: keeping the unthinkable in the differential. *Acad Emerg Med*  
37  
38 2007;14:566-7.  
39
- 40 20. Chan KL, Choi WM, Fong DY, Chow CB, Leung M, Ip P. Characteristics of family  
41  
42 violence victims presenting to emergency departments in Hong Kong. *J Emerg Med*  
43  
44 2013;44:249-58.  
45
- 46 21. Dong X, Simon MA. Elder abuse as a risk factor for hospitalization in older persons. *JAMA*  
47  
48 *Intern Med* 2013;173:911-7.  
49  
50  
51  
52  
53  
54  
55  
56  
57  
58  
59  
60

- 1
  - 2
  - 3
  - 4
  - 5
  - 6
  - 7
  - 8
  - 9
  - 10
  - 11
  - 12
  - 13
  - 14
  - 15
  - 16
  - 17
  - 18
  - 19
  - 20
  - 21
  - 22
  - 23
  - 24
  - 25
  - 26
  - 27
  - 28
  - 29
  - 30
  - 31
  - 32
  - 33
  - 34
  - 35
  - 36
  - 37
  - 38
  - 39
  - 40
  - 41
  - 42
  - 43
  - 44
  - 45
  - 46
  - 47
  - 48
  - 49
  - 50
  - 51
  - 52
  - 53
  - 54
  - 55
  - 56
  - 57
  - 58
  - 59
  - 60
22. Lachs MS, Williams CS, O'Brien S, Pillemer KA. Adult protective service use and nursing home placement. *Gerontologist* 2002;42:734-9.
23. Dong X, Simon MA. Association between reported elder abuse and rates of admission to skilled nursing facilities: findings from a longitudinal population-based cohort study. *Gerontology* 2013;59:464-72.
24. Mouton CP, Rodabough RJ, Rovi SL, et al. Prevalence and 3-year incidence of abuse among postmenopausal women. *Am J Public Health* 2004;94:605-12.
25. Jackson AM, Deye KP, Halley T, et al. Curiosity and critical thinking: identifying child abuse before it is too late. *Clin Pediatr* 2015;54:54-61.
26. Jenny C, Hymel KP, Ritzen A, Reinert SE, Hay TC. Analysis of missed cases of abusive head trauma. *JAMA* 1999;281:621-6.
27. King WK, Kiesel EL, Simon HK. Child abuse fatalities: are we missing opportunities for intervention? *Pediatr Emerg Care* 2006;22:211-4.
28. Letson MM, Cooper JN, Deans KJ, et al. Prior opportunities to identify abuse in children with abusive head trauma. *Child Abuse Negl* 2016;60:36-45.
29. Ravichandiran N, Schuh S, Bejuk M, et al. Delayed identification of pediatric abuse-related fractures. *Pediatrics* 2010;125:60-6.
30. Thorpe EL, Zuckerbraun NS, Wolford JE, Berger RP. Missed opportunities to diagnose child physical abuse. *Pediatr Emerg Care* 2014;30:771-6.
31. Kothari CL, Rhodes KV. Missed opportunities: emergency department visits by police-identified victims of intimate partner violence. *Ann Emerg Med* 2006;47:190-9.
32. Willson P, Cesario S, Fredland N, et al. Primary healthcare provider's lost opportunity to help abused women. *J Am Acad Nurse Pract* 2001;13:565-70.

- 1
- 2
- 3 33. Lindberg DM, Beaty B, Juarez-Colunga E, Wood JN, Runyan DK. Testing for abuse in
- 4 children with sentinel injuries. *Pediatrics* 2015;136:831-8.
- 5
- 6
- 7
- 8 34. Sheets LK, Leach ME, Koszewski IJ, Lessmeier AM, Nugent M, Simpson P. Sentinel
- 9 injuries in infants evaluated for child physical abuse. *Pediatrics* 2013;131:701-7.
- 10
- 11
- 12 35. Brown DS, Fang X, Florence CS. Medical costs attributable to child maltreatment a
- 13 systematic review of short- and long-term effects. *Am J Prev Med* 2011;41:627-35.
- 14
- 15
- 16
- 17 36. Rovi S, Chen PH, Johnson MS. The economic burden of hospitalizations associated with
- 18 child abuse and neglect. *Am J Public Health* 2004;94:586-90.
- 19
- 20
- 21 37. Florence C, Brown DS, Fang X, Thompson HF. Health care costs associated with child
- 22 maltreatment: impact on medicaid. *Pediatrics* 2013;132:312-8.
- 23
- 24
- 25
- 26 38. Jones AS, Dienemann J, Schollenberger J, et al. Long-term costs of intimate partner
- 27 violence in a sample of female HMO enrollees. *Womens Health Issues* 2006;16:252-61.
- 28
- 29
- 30 39. Peterson C, Xu L, Florence C, et al. The medical cost of abusive head trauma in the United
- 31 States. *Pediatrics* 2014;134:91-9.
- 32
- 33
- 34
- 35 40. Miller TR, Steinbeigle R, Lawrence BA, et al. Lifetime cost of abusive head trauma at ages
- 36 0-4, USA. *Prev Sci* 2017.
- 37
- 38
- 39
- 40 41. Fang X, Brown DS, Florence CS, Mercy JA. The economic burden of child maltreatment in
- 41 the United States and implications for prevention. *Child Abuse Negl* 2012;36:156-65.
- 42
- 43
- 44 42. Max W, Rice DP, Finkelstein E, Bardwell RA, Leadbetter S. The economic toll of intimate
- 45 partner violence against women in the United States. *Violence Vict* 2004;19:259-72.
- 46
- 47
- 48
- 49 43. Thielen FW, Ten Have M, de Graaf R, et al. Long-term economic consequences of child
- 50 maltreatment: a population-based study. *Eur Child Adolesc Psychiatry* 2016;25:1297-305.
- 51
- 52
- 53
- 54
- 55
- 56
- 57
- 58
- 59
- 60



- 1  
2  
3 44. Yang J, Miller TR, Zhang N, LeHew B, Peek-Asa C. Incidence and cost of sexual violence  
4  
5 in Iowa. *Am J Prev Med* 2014;47:198-202.  
6
- 7  
8 45. Teresi JA, Burnes D, Skowron EA, et al. State of the science on prevention of elder abuse  
9  
10 and lessons learned from child abuse and domestic violence prevention: Toward a  
11  
12 conceptual framework for research. *J Elder Abuse Negl* 2016;28:263-300.  
13
- 14  
15 46. McCall N. Centers for Medicare and Medicaid Services. Investigation of Increasing Rates of  
16  
17 Hospitalization for Ambulatory Care Sensitive Conditions Among Medicare Fee-for-Service  
18  
19 Beneficiaries. (Accessed on February 10, 2020, at: [https://www.cms.gov/Research-](https://www.cms.gov/Research-Statistics-Data-and-Systems/Statistics-Trends-and-Reports/Reports/Downloads/McCall_2004_3.pdf)  
20  
21 [Statistics-Data-and-Systems/Statistics-Trends-and-](https://www.cms.gov/Research-Statistics-Data-and-Systems/Statistics-Trends-and-Reports/Reports/Downloads/McCall_2004_3.pdf)  
22  
23 [Reports/Reports/Downloads/McCall\\_2004\\_3.pdf](https://www.cms.gov/Research-Statistics-Data-and-Systems/Statistics-Trends-and-Reports/Reports/Downloads/McCall_2004_3.pdf))  
24  
25
- 26  
27 47. Merrick ES, Hodgkin D, Garnick DW, et al. Older adults' inpatient and emergency  
28  
29 department utilization for ambulatory-care-sensitive conditions: relationship with alcohol  
30  
31 consumption. *J Aging Health* 2011;23:86-111.  
32
- 33  
34 48. Brownell J, Wang J, Smith A, Stephens C, Hsia RY. Trends in emergency department visits  
35  
36 for ambulatory care sensitive conditions by elderly nursing home residents, 2001 to 2010.  
37  
38 *JAMA Intern Med* 2014;174:156-8.  
39
- 40  
41 49. Carter MW, Datti B, Winters JM. ED visits by older adults for ambulatory care-sensitive  
42  
43 and supply-sensitive conditions. *Am J Emerg Med* 2006;24:428-34.  
44
- 45  
46 50. Duseja R, Bardach NS, Lin GA, et al. Revisit rates and associated costs after an emergency  
47  
48 department encounter: a multistate analysis. *Ann Intern Med* 2015;162:750-6.  
49
- 50  
51 51. Jencks SF, Williams MV, Coleman EA. Rehospitalizations among patients in the Medicare  
52  
53 fee-for-service program. *N Engl J Med* 2009;360:1418-28.  
54  
55  
56  
57  
58  
59  
60

- 1
- 2
- 3 52. Liu SW, Obermeyer Z, Chang Y, Shankar KN. Frequency of ED revisits and death among
- 4 older adults after a fall. *Am J Emerg Med* 2015;33:1012-8.
- 5
- 6
- 7
- 8 53. Vashi AA, Fox JP, Carr BG, et al. Use of hospital-based acute care among patients recently
- 9 discharged from the hospital. *JAMA* 2013;309:364-71.
- 10
- 11
- 12 54. Ahmad M, Lachs MS. Elder abuse and neglect: what physicians can and should do. *Clev*
- 13 *Clin J Med* 2002;69:801-8.
- 14
- 15
- 16
- 17 55. Rosen T, Stern ME, Elman A, Mulcare MR. Identifying and initiating intervention for elder
- 18 abuse and neglect in the Emergency Department. *Clin Geriatr Med* 2018;34:435-51.
- 19
- 20
- 21 56. Friedlaender EY, Rubin DM, Alpern ER, Mandell DS, Christian CW, Alessandrini EA.
- 22 Patterns of health care use that may identify young children who are at risk for
- 23 maltreatment. *Pediatrics* 2005;116:1303-8.
- 24
- 25
- 26
- 27
- 28 57. Merrick EL, Hodgkin D, Garnick DW, et al. Unhealthy drinking patterns and receipt of
- 29 preventive medical services by older adults. *J Gen Intern Med* 2008;23:1741-8.
- 30
- 31
- 32
- 33 58. Asch SM, Sloss EM, Hogan C, Brook RH, Kravitz RL. Measuring underuse of necessary
- 34 care among elderly Medicare beneficiaries using inpatient and outpatient claims. *JAMA*
- 35 2000;284:2325-33.
- 36
- 37
- 38
- 39
- 40 59. Klabunde CN, Meissner HI, Wooten KG, Breen N, Singleton JA. Comparing colorectal
- 41 cancer screening and immunization status in older americans. *Am J Prev Med* 2007;33:1-8.
- 42
- 43
- 44 60. Ozminkowski RJ, Goetzel RZ, Shechter D, Stapleton DC, Baser O, Lapin P. Predictors of
- 45 preventive service use among Medicare beneficiaries. *Health Care Financ Rev* 2006;27:5-
- 46 23.
- 47
- 48
- 49
- 50
- 51
- 52
- 53
- 54
- 55
- 56
- 57
- 58
- 59
- 60

- 1  
2  
3  
4  
5  
6  
7  
8  
9  
10  
11  
12  
13  
14  
15  
16  
17  
18  
19  
20  
21  
22  
23  
24  
25  
26  
27  
28  
29  
30  
31  
32  
33  
34  
35  
36  
37  
38  
39  
40  
41  
42  
43  
44  
45  
46  
47  
48  
49  
50  
51  
52  
53  
54  
55  
56  
57  
58  
59  
60
61. Scott TL, Gazmararian JA, Williams MV, Baker DW. Health literacy and preventive health care use among Medicare enrollees in a managed care organization. *Med Care* 2002;40:395-404.
  62. Colligan EM, Pines JM, Colantuoni E, Wolff JL. Factors Associated With Frequent Emergency Department Use in the Medicare Population. *Medical Care Res Rev* 2017;73:311-327.
  63. Bice TW, Boxerman SB. A quantitative measure of continuity of care. *Med Care* 1977;15:347-9.
  64. Jha AK, Aubert RE, Yao J, Teagarden JR, Epstein RS. Greater adherence to diabetes drugs is linked to less hospital use and could save nearly \$5 billion annually. *Health Aff (Millwood)* 2012;31:1836-46.
  65. Roebuck MC, Liberman JN, Gemmill-Toyama M, Brennan TA. Medication adherence leads to lower health care use and costs despite increased drug spending. *Health Aff (Millwood)* 2011;30:91-9.
  66. Mues KE, Liede A, Liu J, et al. Use of the Medicare database in epidemiologic and health services research: a valuable source of real-world evidence on the older and disabled populations in the US. *Clin Epidemiol* 2017;9:267-77.
  67. Chen J, Hsieh AF, Dharmarajan K, Masoudi FA, Krumholz HM. National trends in heart failure hospitalization after acute myocardial infarction for Medicare beneficiaries: 1998-2010. *Circulation* 2013;128:2577-84.
  68. Fitch K, Pelizzari PM, Pyenson B. Inpatient Utilization and Costs for Medicare Fee-for-Service Beneficiaries with Heart Failure. *Am Health Drug Benefits* 2016;9:96-104.

- 1  
2  
3 69. Genao L, Durheim MT, Mi X, Todd JL, Whitson HE, Curtis LH. Early and Long-term  
4 Outcomes of Older Adults after Acute Care Encounters for Chronic Obstructive Pulmonary  
5 Disease Exacerbation. *Ann Am Thorac Soc* 2015;12:1805-12.  
6  
7  
8  
9  
10 70. Wetmore JB, Peng Y, Jackson S, Matlon TJ, Collins AJ, Gilbertson DT. Patient  
11 characteristics, disease burden, and medication use in stage 4 - 5 chronic kidney disease  
12 patients. *Clin Nephrol* 2016;85:101-11.  
13  
14  
15  
16  
17 71. Baicker K, Chandra A, Skinner JS, Wennberg JE. Who you are and where you live: how  
18 race and geography affect the treatment of medicare beneficiaries. *Health Aff*  
19 (Millwood):VAR33-44.  
20  
21  
22  
23  
24 72. Joynt KE, Orav EJ, Jha AK. Thirty-day readmission rates for Medicare beneficiaries by race  
25 and site of care. *JAMA* 2011;305:675-81.  
26  
27  
28  
29 73. Merrick EL, Horgan CM, Hodgkin D, et al. Unhealthy drinking patterns in older adults:  
30 prevalence and associated characteristics. *J Am Geriatr Soc* 2008;56:214-23.  
31  
32  
33 74. Colligan EM, Pines JM, Colantuoni E, Howell B, Wolff JL. Risk Factors for Persistent  
34 Frequent Emergency Department Use in Medicare Beneficiaries. *Ann Emerg Med*  
35 2016;67:721-9.  
36  
37  
38  
39  
40 75. Phongtankuel V, Johnson P, Reid MC, et al. Risk factors for hospitalization of home  
41 hospice enrollees. *Am J Hosp Palliat Care* 2016:1049909116659439.  
42  
43  
44  
45 76. ResDAC Research Data Assistance Center. Data Availability. (Accessed on February 10,  
46 2020 at <https://www.resdac.org/cms-data/file-availability>.)  
47  
48  
49 77. Annest JL, Fingerhut LA, Gallagher SS, et al. Strategies to improve external cause-of-injury  
50 coding in state-based hospital discharge and emergency department data systems:  
51  
52  
53  
54  
55  
56  
57  
58  
59  
60

- 1  
2  
3 recommendations of the CDC Workgroup for Improvement of External Cause-of-Injury  
4 Coding. *MMWR Recomm Rep* 2008;57:1-15.  
5  
6  
7  
8 78. Coben JH, Steiner CA, Barrett M, Merrill CT, Adamson D. Completeness of cause of injury  
9 coding in healthcare administrative databases in the United States, 2001. *Inj Prev*  
10 2006;12:199-201.  
11  
12  
13  
14 79. Spivey MI, Schnitzer PG, Kruse RL, Slusher P, Jaffe DM. Association of injury visits in  
15 children and child maltreatment reports. *J Emerg Med* 2009;36:207-14.  
16  
17  
18  
19 80. LaCalle E, Rabin E. Frequent users of emergency departments: the myths, the data, and the  
20 policy implications. *Ann Emerg Med* 2010;56:42-8.  
21  
22  
23  
24 81. Locker TE, Baston S, Mason SM, Nicholl J. Defining frequent use of an urban emergency  
25 department. *Emerg Med J* 2007;24:398-401.  
26  
27  
28  
29 82. Davis JW, Fujimoto RY, Chan H, Juarez DT. Identifying characteristics of patients with low  
30 urgency emergency department visits in a managed care setting. *Manag Care* 2010;19:38-  
31 44.  
32  
33  
34  
35 83. Uscher-Pines L, Pines J, Kellermann A, Gillen E, Mehrotra A. Emergency department visits  
36 for nonurgent conditions: systematic literature review. *Am J Manag Care* 2013;19:47-59.  
37  
38  
39  
40 84. Bayliss EA, Ellis JL, Shoup JA, Zeng C, McQuillan DB, Steiner JF. Effect of continuity of  
41 care on hospital utilization for seniors with multiple medical conditions in an integrated  
42 health care system. *Ann Fam Med* 2015;13:123-9.  
43  
44  
45  
46 85. Liss DT, Chubak J, Anderson ML, Saunders KW, Tuzzio L, Reid RJ. Patient-reported care  
47 coordination: associations with primary care continuity and specialty care use. *Ann Fam*  
48 *Med* 2011;9:323-9.  
49  
50  
51  
52  
53  
54  
55  
56  
57  
58  
59  
60

- 1  
2  
3 86. Hess LM, Raebel MA, Conner DA, Malone DC. Measurement of adherence in pharmacy  
4 administrative databases: a proposal for standard definitions and preferred measures. *Ann*  
5  
6 *Pharmacother* 2006;40:1280-88.  
7  
8
- 9  
10 87. Karve S, Cleves MA, Helm M, Hudson TJ, West DS, Martin BC. Good and poor adherence:  
11 optimal cut-point for adherence measures using administrative claims data. *Curr Med Res*  
12  
13 *Opin* 2009;25:2303-10.  
14  
15
- 16 88. Colantonio LD, Huang L, Monda KL, et al. Adherence to High-Intensity Statins Following  
17 a Myocardial Infarction Hospitalization Among Medicare Beneficiaries. *JAMA Cardiol*  
18  
19 2017;2:890-5.  
20  
21
- 22 89. Ostbye T, Taylor DH, Jr., Clipp EC, Scoyoc LV, Plassman BL. Identification of dementia:  
23 agreement among national survey data, medicare claims, and death certificates. *Health Serv*  
24  
25 *Res* 2008;43:313-26.  
26  
27
- 28 90. Taylor DH, Jr., Fillenbaum GG, Ezell ME. The accuracy of medicare claims data in  
29 identifying Alzheimer's disease. *J Clin Epidemiol* 2002;55:929-37.  
30  
31
- 32 91. Faurot KR, Jonsson Funk M, Pate V, et al. Using claims data to predict dependency in  
33 activities of daily living as a proxy for frailty. *Pharmacoepidemiol Drug Saf* 2015;24:59-66.  
34  
35
- 36 92. Zhang HT, McGrath LJ, Wyss R, Ellis AR, Sturmer T. Controlling confounding by frailty  
37 when estimating influenza vaccine effectiveness using predictors of dependency in activities  
38  
39 of daily living. *Pharmacoepidemiol Drug Saf* 2017.  
40  
41
- 42 93. Rosen T, Bloemen EM, LoFaso VM, Clark S, Flomenbaum NE, Lachs MS. Emergency  
43  
44 Department presentations for injuries in older adults independently known to be victims of  
45  
46 elder abuse. *J Emerg Med* 2016;50:518-26.  
47  
48  
49  
50  
51  
52  
53  
54  
55  
56  
57  
58  
59  
60

- 1  
2  
3 94. Rosen T, LoFaso V, Bloemen EM, et al. Injury patterns in physical elder abuse: preliminary  
4 findings from a pilot sample of highly adjudicated cases. Society of Academic Emergency  
5 Medicine Annual Scientific Meeting. San Diego 2015.  
6  
7  
8  
9  
10 95. Jackson, S. Understanding elder abuse: new directions for developing theories of elder  
11 abuse occurring in domestic settings. 2013. (Accessed on February 10, 2020, at  
12 <https://www.ncjrs.gov/pdffiles1/nij/241731.pdf>)  
13  
14  
15  
16  
17 96. Wong NZ, Rosen T, Sanchez AM, et al. Imaging findings in elder abuse: a role for  
18 radiologists in detection. *Can Assoc Radiol J* 2017;68:16-20.  
19  
20  
21 97. Zhang Y, Padman R. Paving the COWPath: Learning and Visualizing Clinical Pathways  
22 from Electronic Health Record Data. Carnegie Mellon University; 2015.  
23  
24  
25  
26 98. Movahedi F, Carey L, Zhang Y, Padman R, Antaki J. Care pathway after Left Ventricular  
27 Assist Devices (LVAD) implementation. International Society for Heart and Lung  
28 Transplantation. San Diego, CA 2017.  
29  
30  
31  
32  
33 99. Ghosh S, Li J, Cao L, Ramamohanarao K. Septic shock prediction for ICU patients via  
34 coupled HMM walking on sequential contrast patterns. *J Biomed Inform* 2017;66:19-31.  
35  
36  
37  
38 100. Kawamoto R, Nazir A, Kameyama A, et al. Hidden Markov model for analyzing time-series  
39 health checkup data. *Stud Health Technol Inform* 2013;192:491-5.  
40  
41  
42  
43 101. Watkins RE, Eagleson S, Veenendaal B, Wright G, Plant AJ. Disease surveillance using a  
44 hidden Markov model. *BMC Med Inform Decis Mak* 2009;9:39.  
45  
46  
47 102. Zhang Y, Padman R. Innovations in chronic care delivery using data-driven clinical  
48 pathways. *Am J Manag Care* 2015;21:e661-8.  
49  
50  
51  
52  
53  
54  
55  
56  
57  
58  
59  
60

- 1  
2  
3 103. Duncan DF, Kum HC, Weigensberg EC, Flair KA, Stewart CJ. Informing child welfare  
4  
5 policy and practice: Using knowledge discovery and data mining technology via a dynamic  
6  
7 web site. *Child Maltreat* 2008;13:383-91.  
8  
9
- 10 104. Hye-Chung (Monica) Kum JP, Wei Wang, Dean Duncan. ApproxMAP: Approximate  
11  
12 Mining of Consensus Sequential Patterns. (Accessed on February 10, 2020 at  
13  
14 <http://citeseerx.ist.psu.edu/viewdoc/download?doi=10.1.1.12.2633&rep=rep1&type=pdf>)  
15  
16
- 17 105. Zaki MJ. SPADE: An Efficient Algorithm for Mining Frequent Sequences. *Machine*  
18  
19 Learning 2001;42:31-60.  
20
- 21 106. Rabiner L. A tutorial on hidden Markov models and selected applications in speech  
22  
23 recognition. *IEEE* 1989. (Accessed on February 10, 2020 at  
24  
25 [http://www.ece.ucsb.edu/Faculty/Rabiner/ece259/Reprints/tutorial%20on%20hmm%20and](http://www.ece.ucsb.edu/Faculty/Rabiner/ece259/Reprints/tutorial%20on%20hmm%20and%20applications.pdf)  
26  
27 [%20applications.pdf](http://www.ece.ucsb.edu/Faculty/Rabiner/ece259/Reprints/tutorial%20on%20hmm%20and%20applications.pdf))  
28  
29  
30  
31  
32  
33  
34  
35  
36  
37  
38  
39  
40  
41  
42  
43  
44  
45  
46  
47  
48  
49  
50  
51  
52  
53  
54  
55  
56  
57  
58  
59  
60



1  
2  
3 **Authors' contributions:** TR, YB, YZ, SC, AE, KP, MSL conceived of the study. TR, YB, YZ,  
4 SC, KW, AE, PJJ, EB, DL, RK, JC, RB, TF, KP, MSL contributed to the design of the study  
5 protocol. TR wrote the manuscript first draft.  
6  
7

8  
9  
10 YB, YZ, SC, KW, AE, PJJ, EB, DL, RK, JC, RB, TF, KP, MSL contributed to and approved the  
11 final manuscript.  
12  
13

14 **Funding statement:** This work was supported by a grant from the National Institute on Aging  
15 (R01 AG060086). Tony Rosen's participation has also been supported by a Paul B. Beeson  
16 Emerging Leaders Career Development Award in Aging (K76 AG054866) from the National  
17 Institute on Aging. The funder has not been involved in the design or conduct of the research.  
18  
19  
20  
21  
22  
23

24  
25  
26 **Competing interests statement:** Authors have no competing interests to report.  
27  
28

29  
30 **Acknowledgements:** We deeply appreciate the continued partnership of our colleagues /  
31 partners at the King's Count District Attorney's Office in Brooklyn, NY and the King County  
32 Prosecuting Attorney's Office in Seattle, WA without whom this work wouldn't be possible.  
33  
34  
35  
36  
37  
38  
39  
40  
41  
42  
43  
44  
45  
46  
47  
48  
49  
50  
51  
52  
53  
54  
55  
56  
57  
58  
59  
60

1  
2  
3  
4  
5  
6  
7  
8  
9  
10  
11  
12  
13  
14  
15  
16  
17  
18  
19  
20  
21  
22  
23  
24  
25  
26  
27  
28  
29  
30  
31  
32  
33  
34  
35  
36  
37  
38  
39  
40  
41  
42  
43  
44  
45  
46  
47  
48  
49  
50  
51  
52  
53  
54  
55  
56  
57  
58  
59  
60

**Figure 1: Conceptual Framework for Health Care Utilization by Elder Abuse Victims**

For peer review only

**Table 1: Selected Key Measures of Health Care Utilization**

| Site / Type          | Utilization Measure                                                                                                                                                                                                                                                                                                                                                                                                                 |
|----------------------|-------------------------------------------------------------------------------------------------------------------------------------------------------------------------------------------------------------------------------------------------------------------------------------------------------------------------------------------------------------------------------------------------------------------------------------|
| Emergency Department | <ul style="list-style-type: none"> <li>• Injury-related visits</li> <li>• Total visits, including identification of high-frequency users</li> <li>• Low urgency visits, visits for ambulatory care sensitive conditions</li> <li>• Repeat visits to the ED within 3 days, 7 days, 30 days of initial visit</li> <li>• Visits to multiple EDs</li> </ul>                                                                             |
| Hospital             | <ul style="list-style-type: none"> <li>• Injury-related hospitalizations</li> <li>• Total hospitalizations</li> <li>• Visits for ambulatory care sensitive conditions</li> <li>• Repeat hospitalizations within 30 days, 90 days of initial hospitalization</li> <li>• Visits to multiple hospitals</li> </ul>                                                                                                                      |
| Outpatient           | <ul style="list-style-type: none"> <li>• Injury-related visits to primary care provider</li> <li>• Total visits to primary care provider</li> <li>• Receipt of preventative services</li> <li>• Periods with no primary care provider selected</li> <li>• Changes to primary care provider</li> <li>• Continuity of care (via Continuity of Care Index)</li> <li>• Medication adherence (via Proportion of Days Covered)</li> </ul> |

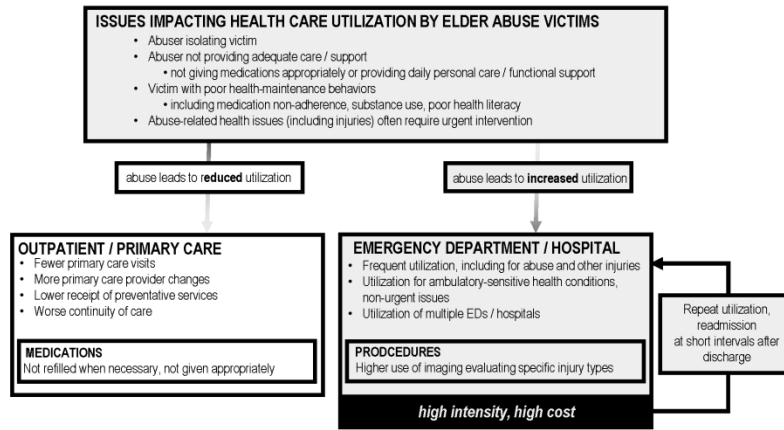

Figure 1: Conceptual Framework for Health Care Utilization by Elder Abuse Victims

190x254mm (300 x 300 DPI)
