# Supplementary material for: Identifying patterns of health care utilisation among physical elder abuse victims using Medicare data and legally adjudicated cases: protocol for case–control study using data linkage and machine learning
Source: PubMed Central journal article supplement — BMJ Open. 2021 Feb 5;11(2):e044768. doi: 10.1136/bmjopen-2020-044768 (PMC7925867; doi:10.1136/bmjopen-2020-044768), 2021-02-05
Supplement: bmjopen-2020-044768.reviewer_comments.pdf [file bmjopen-2020-044768.reviewer_comments.pdf]

## PEER REVIEW HISTORY

BMJ Open publishes all reviews undertaken for accepted manuscripts. Reviewers are asked to complete a checklist review form (<http://bmjopen.bmj.com/site/about/resources/checklist.pdf>) and are provided with free text boxes to elaborate on their assessment. These free text comments are reproduced below.

## ARTICLE DETAILS

|                            |                                                                                                                                                                                                                                           |
|----------------------------|-------------------------------------------------------------------------------------------------------------------------------------------------------------------------------------------------------------------------------------------|
| <b>TITLE (PROVISIONAL)</b> | Identifying Patterns of Health Care Utilization among Physical Elder Abuse Victims Using Medicare Data and Legally Adjudicated Cases: Protocol for Case-Control Study using Data Linkage and Machine Learning                             |
| <b>AUTHORS</b>             | Rosen, Tony; Bao, Yuhua; Zhang, Yiye; Clark, Sunday; Wen, Katherine; Elman, Alyssa; Jeng, Philip; Bloemen, Elizabeth; Lindberg, Daniel; Krugman, Richard; Campbell, Jacquelyn; Bachman, Ronet; Fulmer, Terry; Pillemer, Karl; Lachs, Mark |

This article was not externally reviewed at BMJ Open. Protocols that have been independently assessed prior to submission to BMJ Open are usually fast-tracked to publication on the grounds that further substantial changes will not be possible. This independent assessment will usually be external, independent review for both a substantial grant award from a non-commercial or government funder and ethics approval.
